# Supplementary material
Source: PubMed Central journal article supplement (PMC4460995)
Supplement: NIHMS103031-supplement-1.pdf [file NIHMS103031-supplement-1.pdf]

# Genetic architecture of murine skin inflammation and tumor susceptibility (Supplementary data)

Supplementary Figure 1

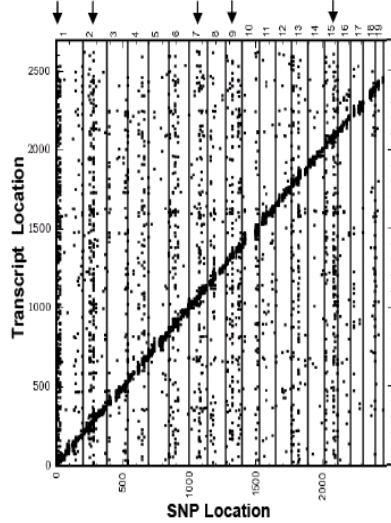

**Distribution of significant trans-eQTL in FVBB tail epidermis.** This figure plots the distribution of all eQTL measured in skin ( $\leq 5\%$  FDR). Genomic location of SNPs across all chromosomes is plotted on the horizontal axis; location of probes is plotted on the vertical axis. No eQTL were calculated on the X or Y chromosomes. Solid vertical lines separate chromosomes. The dark line along the diagonal are putative *cis*-eQTL. Arrows indicate significant hot-spots (chi-squared test, Bonferroni correction for 223 tests). Total trans-eQTL count = 1034. (see Supplementary Tables 1,2 for specific chromosome and SNP breakdowns).

Supplementary Figure 2

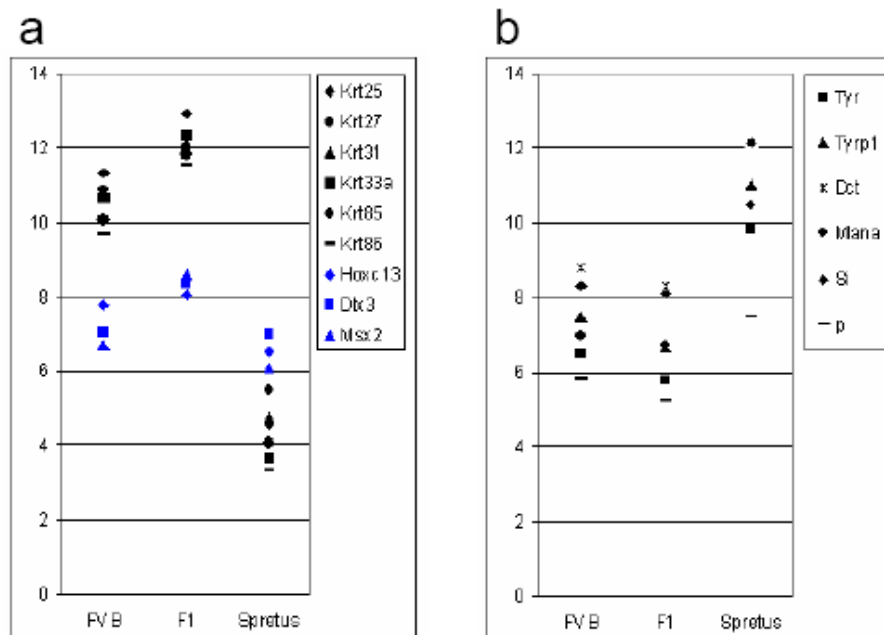

Gene expression in parental mice shows genetic influence on functionally related genes

The Y-axis is the log-transformed mean of four biological replicate gene expression values measured in FVB/N, SPRET/Ei, and FVB x SPRET F1 animals with Affymetrix arrays. All genes are significantly different between strains (FDR  $q$ -value = 0 for all genes).

(A) Gene expression of representative hair follicle genes. Structural genes are shown in black; transcription factors *Hoxc13*, *Dlx3*, and *Msx2* are shown in blue.

(B) Gene expression of melanin biosynthesis genes.

### Supplementary Figure 3

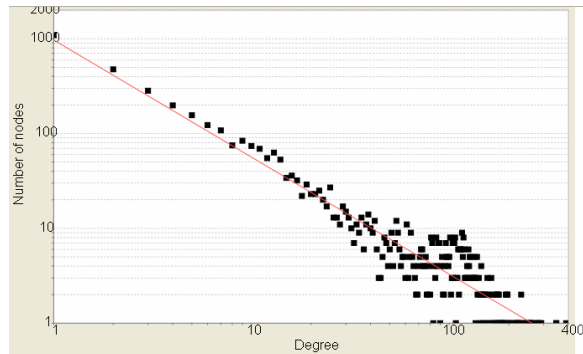

#### Degree Distribution of FVBBX correlation network.

Structural characteristics of the FVBBX relevance network were calculated using the NetworkAnalyzer<sup>31</sup> plug-in for Cytoscape. The correlation coefficient cut-off for the relevance network was 0.8. The network contains 3933 nodes and 40,335 edges. The mean number of neighbors is 19.3 and the mean clustering coefficient is 0.35. The network is plausibly scale-free, as a linear least-squares fit of the log degree to log number of nodes had an  $r$ -squared value of 0.88 for a power law of the form  $y=969.25x^{-1.235}$ .

### Supplementary Figure 4

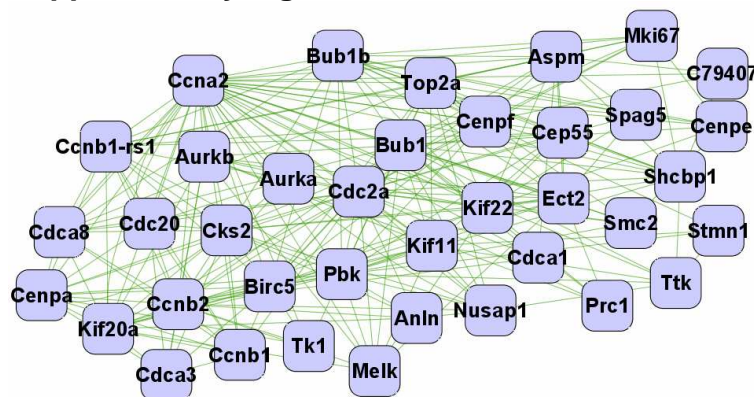

**Cell Cycle gene correlation network in FVBBX.** Edges indicate correlation  $r^2 \geq 0.64$ . This clique was automatically identified from the FVBBX tail epidermal gene expression.

## Supplementary Figure 5

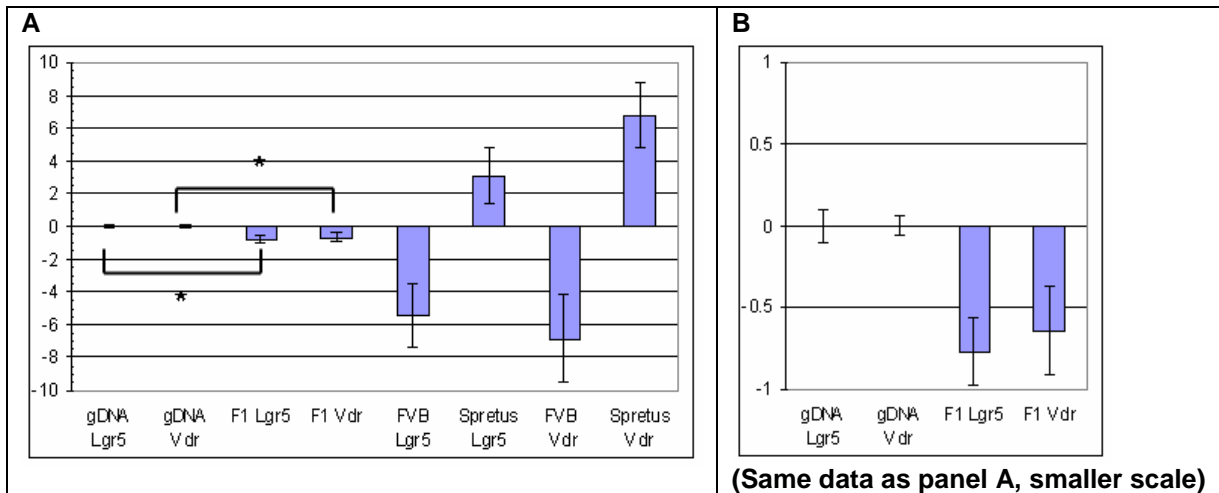

### Taqman validation of allele-specific expression of *Lgr5* and *Vdr* in parental and F1 animals.

Cis-regulation of *Vdr* and *Lgr5* was verified by a cis-trans test. We performed allele-specific Taqman of SPRET/Ei (n = 4), FVB/N (n = 4), and F1 (n = 3) RNA. Allele-specific Taqman probes were designed by sequencing *Lgr5* and *Vdr* in SPRET/Ei and FVB/N. The first two columns show  $\Delta\Delta\text{Ct}$  for the genomic DNA used as a control to adjust for unequal efficiency of the FAM and VIC probes. The next two columns show  $\Delta\Delta\text{Ct}$  values for *Lgr5* and *Vdr* probes in F1 (also presented at right, smaller scale). The last four columns show  $\Delta\Delta\text{Ct}$  values for *Lgr5* and *Vdr* probes in FVB/N and SPRET/Ei. Although the measured effect is modest, the difference from genomic DNA is significant ( $p < 0.05$ , both genes).

## Supplementary Figure 6

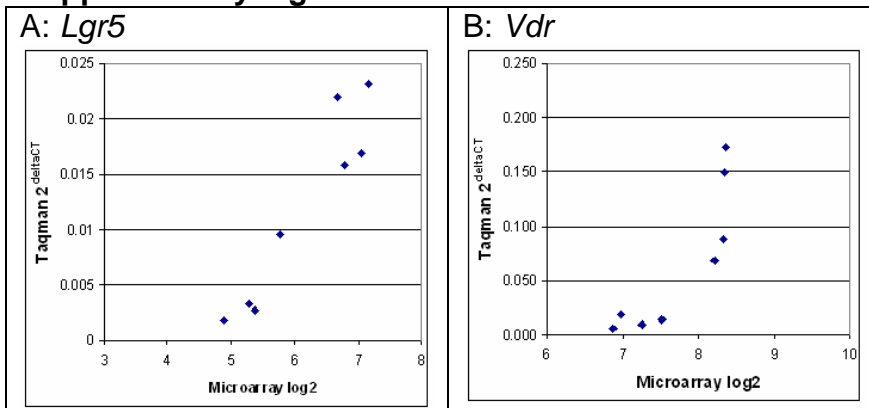

**Taqman validation of microarray expression measurements of *Lgr5* and *Vdr*.** *Lgr5* and *Vdr* expression in parental FVB/N and SPRET/Ei strains as measured by Taqman was compared expression measured by Affymetrix microarray. *Lgr5* expression as measured by Taqman is highly correlated with expression measured by the microarray (correlation r-squared value 0.81, p-value 0.005). Expression of *Vdr* as measured by Taqman is highly correlated with expression measured by Affymetrix microarray (correlation r-squared 0.85, p-value 0.002).

## Supplementary Figure 7

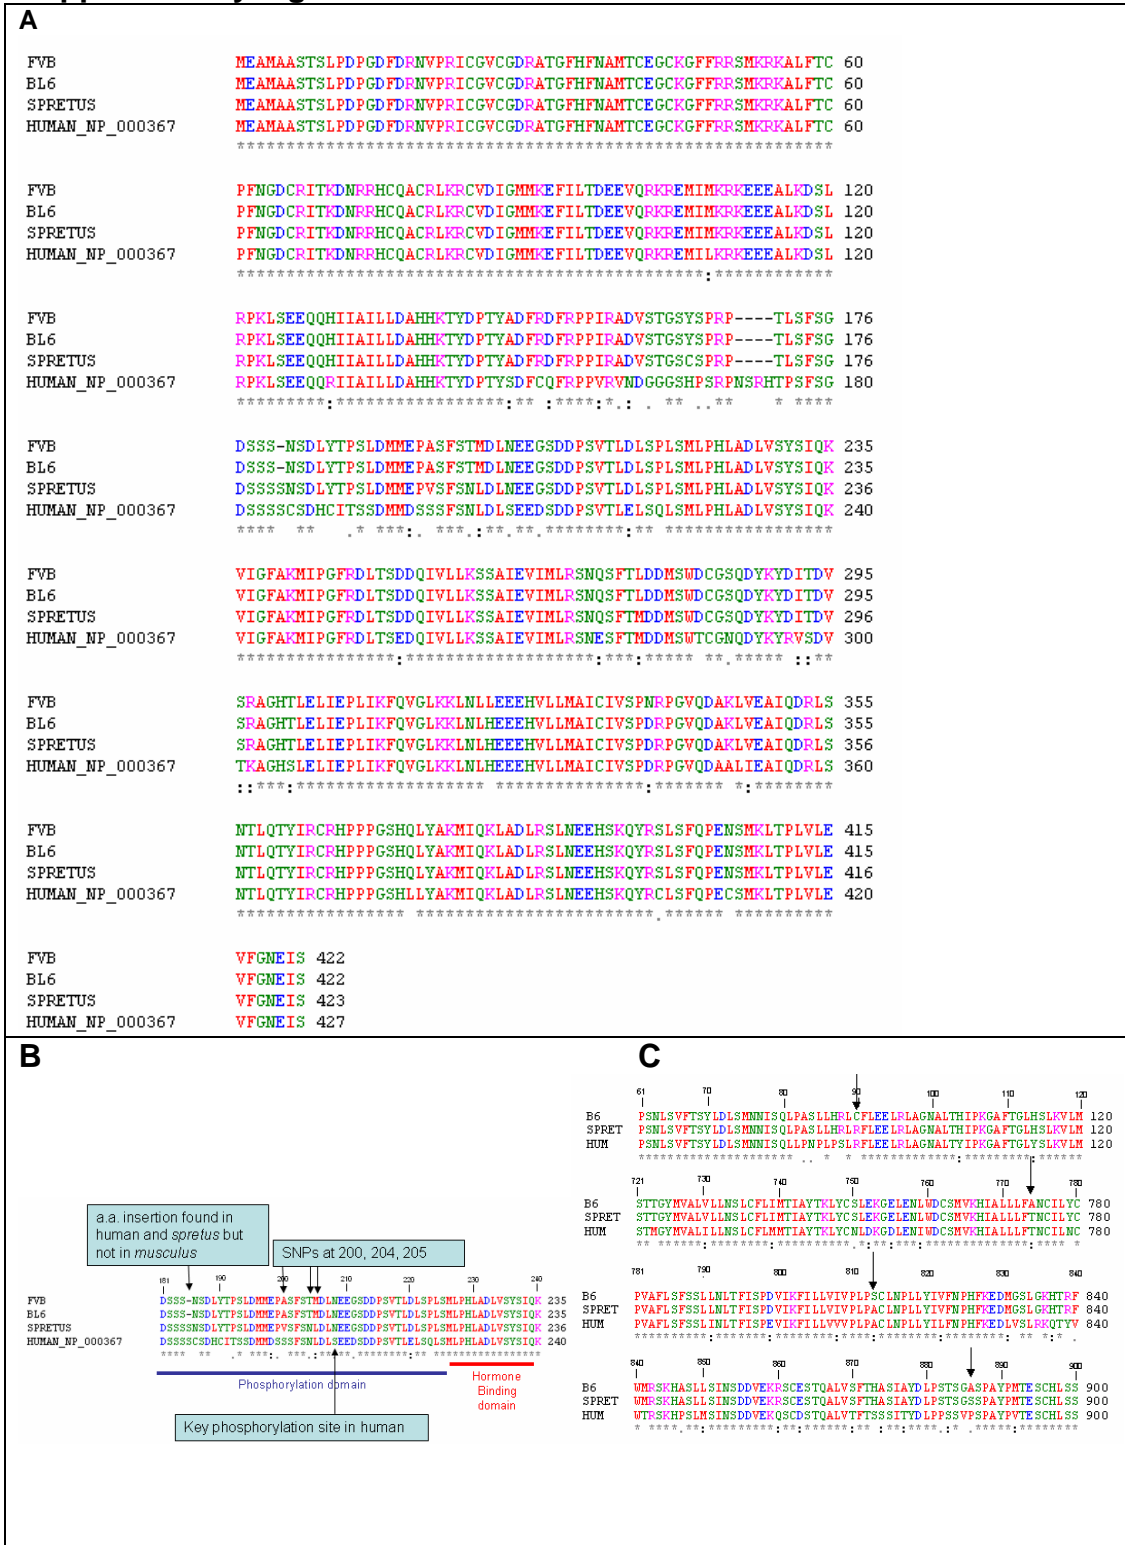

**Aligned protein sequences of FVB/N, C57/B6, SPRET/Ei, and human *Vdr*.** We sequenced the coding exons of the *Vdr* in FVB/N and SPRET/Ei mice and aligned the imputed protein sequences against C57/BL6 and the human NP\_000367 *Vdr* sequence (A). For the first 180 human amino acids (a.a.) there are no non-synonymous coding changes between mouse species in *Vdr*. There are

several loci that differ between human and mouse, and four inserted human a.a. not found in mouse. There are three protein-coding changes between FVB/N and SPRET/Ei in the second *Vdr* phosphorylation domain and an a.a. inserted in human and SPRET/Ei but not *Mus musculus* (B). S208 is known to be a key phosphorylation site in humans. There is also a SNP resulting in a protein change between Spretus and FVB in the hormone-binding domain at human a.a. 281.

### Supplementary Figure 8

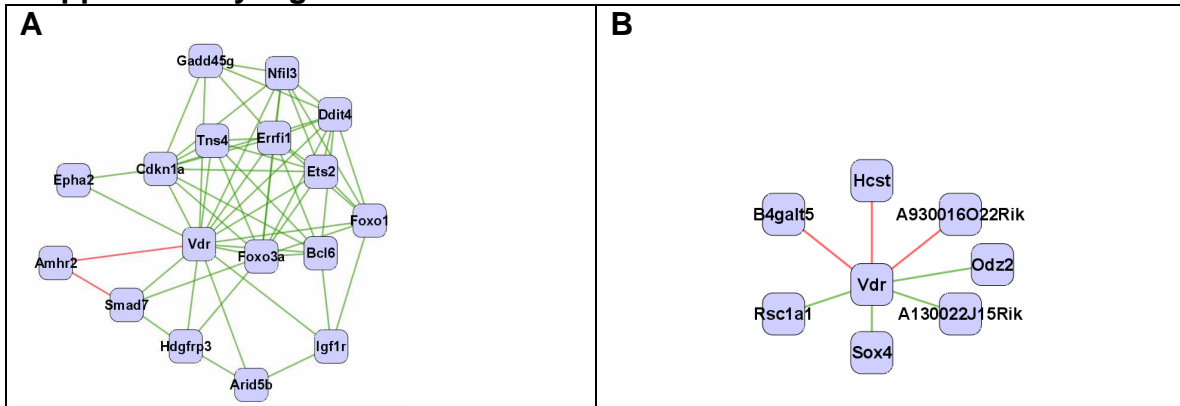

#### Distinct *Vdr* correlation networks for mice homozygous and heterozygous at Chr15, 101 Mb.

Genes correlated with *Vdr* in mice homozygous for FVB/N at Chr15:101 Mb (A) or heterozygous FVB/SPRET at that locus (B). Green lines indicate direct correlation; red lines indicate inverse correlation. R-squared values are 0.49 or higher ( $r \geq 0.7$  or  $r \leq -0.7$ ).

It has been shown that *Vdr* ablation sensitizes skin to chemical and UV models of tumorigenesis<sup>32,33</sup>. Our results show that FVBBX mice with a spretus allele at Chr 15:101 Mb have lower levels of *Vdr*, which is associated with higher tumor susceptibility. We performed differential correlation analyses of *Vdr* to identify the individual co-expression networks for mice heterozygous at Chr 15:101 Mb (n=39) and mice homozygous at that allele (n = 32). There is not a significantly non-random sex distribution in these groups (chi-squared test). Using a r-squared cut-off of 0.49, *Vdr* is correlated with genes that affect *Wnt* signaling and tumor susceptibility in homozygous mice but not in heterozygous mice (Figure 2A, 2B). The strongest correlation in the homozygous *Vdr* network is between *Vdr* and the tumor suppressor *Cdkn1a* (*p21*). It is known that *Vdr* binds *p21* directly and this binding increases *p21* expression<sup>34</sup>. *TGF $\beta$*  inhibitory gene *Smad7*, which induces beta-catenin degradation<sup>35</sup>, is one of several *Wnt* modifiers in the homozygous correlation network. *Vdr* is transactivated by *Smad3*<sup>36</sup>, and *Smad7* disrupts the binding of *Vdr* with *Smad3*<sup>37</sup>. The homozygous *Vdr*-correlated transcription factors *Foxo1* and *Foxo3a* compete with TCF for the opportunity to bind beta-catenin, which activates *Foxo* signaling. This activation inhibits cell cycle progression<sup>38,39</sup>. Connections between *Vdr* and *Wnt* signaling have been identified by Cianferotti and co-workers who recently showed that the cooperative effects of *Wnt* signaling genes *Ctnnb1* and *Lef1* are abolished in keratinocytes derived from *Vdr* knockout mice<sup>40</sup>. Other genes in this signature (*Igf1r*, *Ddit4*, *Bcl6*, *Tns4*, *Ets2*, *Hdgfrp3*, *Gadd45g*, and *Epha2*) have been linked directly to tumor susceptibility and proliferation.

Importantly, genes in the *Vdr*-homozygous network are absent in *Vdr*-heterozygous mice. The correlation network in *Vdr*-heterozygous mice is recapitulated at lower stringency in *Vdr*-homozygous mice but not vice-versa (data not shown), suggesting genetic differences may have far-reaching physiological consequences. We sequenced the coding exons of *Vdr* in SPRET/Ei and FVB/N and identified four polymorphisms between these species that result in amino acid changes (Supplementary Figure 7).

The same analysis was then performed for *Lgr5*, identifying the individual co-expression networks for mice heterozygous at Chr 10:118 Mb (n=31) and mice homozygous at that allele (n = 42). There is not a significantly non-random sex distribution in these groups (chi-squared test). Using a r-squared cut-off of 0.49, *Lgr5* is correlated with very similar networks of hair-follicle and epidermal genes in both the *Lgr5*-homozygous and *Lgr5*-heterozygous groups. The principle difference

between the networks is that *Lgr5* is more highly correlated with hair follicle keratins in the *Lgr5*-homozygous group. One possible explanation for this result is the overall much lower expression of hair follicle-related genes in SPRET/Ei tail RNA; hair follicle signaling may be attenuated in these animals, and animals receiving a SPRET/Ei allele have commensurately lower overall levels of hair follicle expression. This is compatible with the fact that these keratins have eQTL at the Chr 10:118 Mb. locus.

### Supplementary Table 1

#### SNPs that are significantly frequent locations for *trans*-eQTL peaks in mouse skin.

P-values from chi-squared test. This lists all SNPs with significant p-values after 0.05 Bonferroni corrected of an alpha level 0.05 for 223 tests. Total *trans*-eQTL count was 1034.

| SNP Location    | <i>trans</i> -eQTL count | P-value          |
|-----------------|--------------------------|------------------|
| Chr. 2, 85 Mb.  | 63                       | $2.0 * 10^{-12}$ |
| Chr. 15, 73 Mb. | 50                       | $1.3 * 10^{-9}$  |
| Chr. 1, 29 Mb.  | 47                       | $5.7 * 10^{-9}$  |
| Chr. 1, 16 Mb.  | 43                       | $4.1 * 10^{-8}$  |
| Chr. 9, 52 Mb.  | 41                       | $1.1 * 10^{-7}$  |
| Chr. 1, 8 Mb.   | 29                       | $3.9 * 10^{-5}$  |
| Chr. 7, 79 Mb.  | 27                       | $1.0 * 10^{-4}$  |

### Supplementary Table 2

#### Details of the eQTL distribution

Highlighted p-values are chromosomes that have significantly more *trans*-eQTL than expected by chance after Bonferroni correction

| Chr | # <i>cis</i> eQTL | # <i>trans</i> eQTL | # eQTL | # SNPs assayed | % eQTLs <i>Trans</i> | % of all <i>trans</i> eQTL | uncorrected p-val for over-representation |
|-----|-------------------|---------------------|--------|----------------|----------------------|----------------------------|-------------------------------------------|
| 1   | 254               | 160                 | 414    | 19             | 38.65%               | 15.47%                     | 4.29E-13                                  |
| 2   | 346               | 133                 | 479    | 20             | 27.77%               | 12.86%                     | 7.60E-09                                  |
| 3   | 176               | 43                  | 219    | 15             | 19.63%               | 4.16%                      | NS                                        |
| 4   | 220               | 49                  | 269    | 12             | 18.22%               | 4.74%                      | NS                                        |
| 5   | 296               | 13                  | 309    | 11             | 4.21%                | 1.26%                      | 5.47E-07                                  |
| 6   | 187               | 91                  | 278    | 15             | 32.73%               | 8.80%                      | 0.002121                                  |
| 7   | 311               | 91                  | 402    | 18             | 22.64%               | 8.80%                      | 0.002121                                  |
| 8   | 190               | 37                  | 227    | 10             | 16.30%               | 3.58%                      | 0.07474                                   |
| 9   | 209               | 105                 | 314    | 10             | 33.44%               | 10.15%                     | 5.24E-05                                  |
| 10  | 130               | 34                  | 164    | 7              | 20.73%               | 3.29%                      | 0.03301                                   |
| 11  | 250               | 21                  | 271    | 11             | 7.75%                | 2.03%                      | 1.39E-04                                  |
| 12  | 166               | 17                  | 183    | 13             | 9.29%                | 1.64%                      | 1.13E-05                                  |
| 13  | 184               | 66                  | 250    | 12             | 26.40%               | 6.38%                      | NS                                        |
| 14  | 142               | 22                  | 164    | 13             | 13.41%               | 2.13%                      | 2.42E-04                                  |
| 15  | 177               | 104                 | 281    | 13             | 37.01%               | 10.06%                     | 6.96E-05                                  |
| 16  | 99                | 10                  | 109    | 6              | 9.17%                | 0.97%                      | 3.80E-08                                  |
| 17  | 205               | 12                  | 217    | 5              | 5.53%                | 1.16%                      | 2.34E-07                                  |
| 18  | 76                | 20                  | 96     | 8              | 20.83%               | 1.93%                      | 7.74E-05                                  |
| 19  | 141               | 6                   | 147    | 5              | 4.08%                | 0.58%                      | 5.76E-10                                  |

### Supplementary Table 3

#### Genes in the muscle gene expression sub-network (Figure 1 in manuscript)

The gene that bridges the muscle gene network and the hair follicle gene network is *Tpm1*, tropomyosin alpha.

| Symbol        | Title                                                                     | Chr. | Mb.   |
|---------------|---------------------------------------------------------------------------|------|-------|
| 1110002E22Rik | RIKEN cDNA 1110002E22 gene                                                | 3    | 138   |
| 1110028A07Rik | RIKEN cDNA 1110028A07 gene                                                | 14   | 54.5  |
| 2310002L09Rik | RIKEN cDNA 2310002L09 gene                                                | 4    | 73.4  |
| 2310016A09Rik | RIKEN cDNA 2310016A09 gene                                                | 15   | 31.5  |
| 2310033F14Rik | RIKEN cDNA 2310033F14 gene                                                | 3    | 89.5  |
| 2310039E09Rik | RIKEN cDNA 2310039E09 gene                                                | 4    | 48.7  |
| 2310046A06Rik | RIKEN cDNA 2310046A06 gene                                                | 9    | 76.9  |
| 2310079P10Rik | RIKEN cDNA 2310079P10 gene                                                | 1    | 40.8  |
| 4631423F02Rik | RIKEN cDNA 4631423F02 gene                                                | 1    | 93.2  |
| 8030451F13Rik | RIKEN cDNA 8030451F13 gene                                                | 10   | 87.9  |
| A2bp1         | Ataxin 2 binding protein 1                                                | 16   | 6.5   |
| Acsf6         | acyl-CoA synthetase long-chain family member 6                            | 11   | 54.2  |
| Acta1         | actin, alpha 1, skeletal muscle                                           | 8    | 126.8 |
| Actn2         | Actinin alpha 2                                                           | 13   | 12.3  |
| Actn3         | actinin alpha 3                                                           | 19   | 4.9   |
| Adssl1        | adenylosuccinate synthetase like 1                                        | 12   | 113.1 |
| Ak1           | adenylate kinase 1                                                        | 2    | 32.4  |
| Akap6         | A kinase (PRKA) anchor protein 6                                          | 12   | 54    |
| Alpk3         | alpha-kinase 3                                                            | 7    | 80.9  |
| Amot          | angiominin                                                                | X    | 140.7 |
| Ampd1         | adenosine monophosphate deaminase 1 (isoform M)                           | 3    | 103.2 |
| Ankrd2        | ankyrin repeat domain 2 (stretch responsive muscle)                       | 19   | 42.1  |
| Ankrd23       | ankyrin repeat domain 23                                                  | 1    | 36.5  |
| Apobec2       | apolipoprotein B editing complex 2                                        | 17   | 47.9  |
| Art1          | ADP-ribosyltransferase 1                                                  | 7    | 102   |
| Asb5          | ankyrin repeat and SOCs box-containing protein 5                          | 8    | 56    |
| Asph          | aspartate-beta-hydroxylase                                                | 4    | 9.4   |
| Atp1a2        | ATPase, Na <sup>+</sup> /K <sup>+</sup> transporting, alpha 2 polypeptide | 1    | 174.1 |
| Atp2a1        | ATPase, Ca <sup>++</sup> transporting, cardiac muscle, fast twitch 1      | 7    | 126.2 |
| Bin1          | bridging integrator 1                                                     | 18   | 32.6  |
| Cacna1s       | calcium channel, voltage-dependent, L type, alpha 1S subunit              | 1    | 137.9 |
| Cacna2d1      | calcium channel, voltage-dependent, alpha2/delta subunit 1                | 5    | 15.4  |
| Cacng1        | calcium channel, voltage-dependent, gamma subunit 1                       | 11   | 107.5 |
| Cap2          | CAP, adenylate cyclase-associated protein, 2 (yeast)                      | 13   | 46.5  |
| Casq1         | calsequestrin 1                                                           | 1    | 174   |
| Cav3          | caveolin 3                                                                | 6    | 112.4 |
| Cfl2          | cofilin 2, muscle                                                         | 12   | 55.8  |
| Chrna1        | cholinergic receptor, nicotinic, alpha polypeptide 1 (muscle)             | 2    | 73.4  |
| Chrb1         | cholinergic receptor, nicotinic, beta polypeptide 1 (muscle)              | 11   | 69.6  |
| Ckm           | creatine kinase, muscle                                                   | 7    | 18.6  |
| Ckmt2         | creatine kinase, mitochondrial 2                                          | 13   | 92.3  |
| Cmya1         | cardiomyopathy associated 1                                               | 9    | 119.9 |
| Cmya5         | cardiomyopathy associated 5                                               | 13   | 94.1  |

|           |                                                            |   |    |       |
|-----------|------------------------------------------------------------|---|----|-------|
| Cox6a2    | cytochrome c oxidase, subunit VI a, polypeptide 2          |   | 7  | 128   |
| Cox7a1    | cytochrome c oxidase, subunit VIIa 1                       |   | 7  | 29.9  |
| Cox8b     | cytochrome c oxidase, subunit VIIIb                        |   | 7  | 140.8 |
| Cryab     | crystallin, alpha B                                        |   | 9  | 50.5  |
| Csrp3     | cysteine and glycine-rich protein 3                        |   | 7  | 48.7  |
| Ddit4l    | DNA-damage-inducible transcript 4-like                     |   | 3  | 137.6 |
| Des       | desmin                                                     |   | 1  | 75.2  |
| Dhrs7c    | dehydrogenase/reductase (SDR family) member 7C             |   | 11 | 67.6  |
| Eef1a2    | eukaryotic translation elongation factor 1 alpha 2         |   | 2  | 181.1 |
| Eno3      | Enolase 3, beta muscle                                     |   | 11 | 70.5  |
| Fabp3     | fatty acid binding protein 3, muscle and heart             |   | 4  | 129.8 |
| Fgf13     | fibroblast growth factor 13                                | X |    | 55.4  |
| Fhl1      | four and a half LIM domains 1                              | X |    | 53.1  |
| Finc      | filamin C, gamma (actin binding protein 280)               |   | 6  | 29.4  |
| Gyg       | glycogenin                                                 |   | 3  | 20.3  |
| Hfe2      | hemochromatosis type 2 (juvenile) (human homolog)          |   | 3  | 96.6  |
| Hrc       | histidine rich calcium binding protein                     |   | 7  | 45.2  |
| Hspb2     | heat shock protein 2                                       |   | 9  | 50.5  |
| Hspb3     | heat shock protein 3                                       |   | 13 | 114.8 |
| Hspb6     | heat shock protein, alpha-crystallin-related, B6           |   | 7  | 30.3  |
| Hspb7     | heat shock protein family, member 7 (cardiovascular)       |   | 4  | 140.7 |
| Itgb1bp2  | integrin beta 1 binding protein 2                          | X |    | 97.7  |
| Jph1      | Junctophilin 1                                             |   | 1  | 17    |
| Jph2      | junctophilin 2                                             |   | 2  | 163   |
| Kbtbd10   | kelch repeat and BTB (POZ) domain containing 10            |   | 2  | 69.5  |
| Kbtbd5    | kelch repeat and BTB (POZ) domain containing 5             |   | 9  | 121.6 |
| LOC380843 | similar to RNA binding motif protein 24                    |   | 13 | 46.4  |
| LOC629147 | similar to Cortixin-1                                      |   | 18 | 57.6  |
| LOC671894 | similar to myosin, heavy polypeptide 4, skeletal muscle    |   | 14 | 53.9  |
| Ldb3      | LIM domain binding 3                                       |   | 14 | 33.4  |
| Lmcd1     | LIM and cysteine-rich domains 1                            |   | 6  | 112.2 |
| Lmod2     | leiomodulin 2 (cardiac)                                    |   | 6  | 24.6  |
| Lrrn1     | leucine rich repeat protein 1, neuronal                    |   | 6  | 107.5 |
| Mapk12    | mitogen-activated protein kinase 12                        |   | 15 | 89    |
| Mb        | myoglobin                                                  |   | 15 | 76.8  |
| Mef2c     | Myocyte enhancer factor 2C                                 |   | 13 | 84.1  |
| Myf6      | myogenic factor 6                                          |   | 10 | 106.9 |
| Myh1      | myosin, heavy polypeptide 1, skeletal muscle, adult        |   | 11 | 67    |
| Myh2      | myosin, heavy polypeptide 2, skeletal muscle, adult        |   | 11 | 67    |
| Myh3      | myosin, heavy polypeptide 3, skeletal muscle, embryonic    |   | 11 | 66.9  |
| Myh6      | Myosin, heavy polypeptide 6, cardiac muscle, alpha         |   | 14 | 53.9  |
| Myh8      | myosin, heavy polypeptide 8, skeletal muscle, perinatal    |   | 11 | 67.1  |
| Myl1      | myosin, light polypeptide 1                                |   | 1  | 66.9  |
| Myl2      | myosin, light polypeptide 2, regulatory, cardiac, slow     |   | 5  | 122.4 |
| Myl3      | myosin, light polypeptide 3                                |   | 9  | 110.6 |
| Mylpf     | myosin light chain, phosphorylatable, fast skeletal muscle |   | 7  | 127   |
| Myom1     | myomesin 1                                                 |   | 17 | 70.9  |
| Myot      | myotilin                                                   |   | 18 | 44.5  |
| Myoz1     | myozenin 1                                                 |   | 14 | 19.4  |



|         |                                                                                                        |   |    |       |
|---------|--------------------------------------------------------------------------------------------------------|---|----|-------|
| Myoz2   | myozenin 2                                                                                             |   | 3  | 123   |
| Mypn    | myopalladin                                                                                            |   | 10 | 62.5  |
| Neb     | nebulin                                                                                                |   | 2  | 52    |
| Nexn    | Nexilin                                                                                                |   | 3  | 152.2 |
| Nrap    | nebulin-related anchoring protein<br>pre-B-cell leukemia transcription factor interacting<br>protein 1 |   | 19 | 56.4  |
| Pbxip1  |                                                                                                        |   | 3  | 89.5  |
| Pde4dip | phosphodiesterase 4D interacting protein (myomegalin)                                                  |   | 3  | 97.8  |
| Pdlim3  | PDZ and LIM domain 3                                                                                   |   | 8  | 47.4  |
| Pdlim5  | PDZ and LIM domain 5                                                                                   |   | 3  | 142.3 |
| Pfkm    | phosphofructokinase, muscle                                                                            |   | 15 | 97.9  |
| Pgam2   | phosphoglycerate mutase 2                                                                              |   | 11 | 5.7   |
| Pitx2   | paired-like homeodomain transcription factor 2                                                         |   | 3  | 129.2 |
| Pkia    | protein kinase inhibitor, alpha                                                                        |   | 3  | 7.3   |
| Ppp1r3c | protein phosphatase 1, regulatory (inhibitor) subunit 3C                                               |   | 19 | 36.8  |
| Prkcq   | protein kinase C, theta                                                                                |   | 2  | 11.2  |
| Pvalb   | parvalbumin                                                                                            |   | 15 | 78    |
| Pygm    | muscle glycogen phosphorylase                                                                          |   | 19 | 6.4   |
| Rpl3l   | ribosomal protein L3-like                                                                              |   | 17 | 24.5  |
| Rragd   | Ras-related GTP binding D                                                                              |   | 4  | 33.4  |
| Rtn2    | reticulum 2 (Z-band associated protein)                                                                |   | 7  | 18.4  |
| Ryr1    | ryanodine receptor 1, skeletal muscle                                                                  |   | 7  | 28.8  |
| Schip1  | Schwannomin interacting protein 1                                                                      |   | 3  | 68.6  |
| Sgca    | sarcoglycan, alpha (dystrophin-associated glycoprotein)                                                |   | 11 | 94.8  |
| Sgcb    | sarcoglycan, gamma (dystrophin-associated<br>glycoprotein)                                             |   | 14 | 60.2  |
| Sh3bgr  | SH3-binding domain glutamic acid-rich protein                                                          |   | 16 | 96.3  |
| Six1    | sine oculis-related homeobox 1 homolog (Drosophila)                                                    |   | 12 | 74    |
| Slc25a4 | solute carrier family 25 (mitochondrial carrier, adenine<br>nucleotide translocator), member 4         |   | 8  | 47.7  |
| Slc2a4  | solute carrier family 2 (facilitated glucose transporter),<br>member 4                                 |   | 11 | 69.8  |
| Sln     | sarcolipin                                                                                             |   | 9  | 53.6  |
| Smpx    | small muscle protein, X-linked                                                                         | X |    | 153   |
| Smtnl1  | smoothelin-like 1                                                                                      |   | 2  | 84.6  |
| Smyd1   | SET and MYND domain containing 1                                                                       |   | 6  | 71.1  |
| Srl     | sarcalumenin                                                                                           |   | 16 | 4.4   |
| Srpk3   | serine/arginine-rich protein specific kinase 3                                                         | X |    | 70    |
| Stac3   | SH3 and cysteine rich domain 3                                                                         |   | 10 | 126.9 |
| Synpo2  | synaptopodin 2                                                                                         |   | 3  | 123.1 |
| Synpo2l | Synaptopodin 2-like                                                                                    |   | 14 | 19.5  |
| Tcap    | titin-cap                                                                                              |   | 11 | 98.2  |
| Tmem38a | transmembrane protein 38a                                                                              |   | 8  | 75.5  |
| Tnnc1   | troponin C, cardiac/slow skeletal                                                                      |   | 14 | 30    |
| Tnnc2   | troponin C2, fast                                                                                      |   | 2  | 164.5 |
| Tnni1   | troponin I, skeletal, slow 1                                                                           |   | 1  | 137.6 |
| Tnni2   | troponin I, skeletal, fast 2                                                                           |   | 7  | 142.3 |
| Tnnt1   | troponin T1, skeletal, slow                                                                            |   | 7  | 4.1   |
| Tnnt3   | troponin T3, skeletal, fast                                                                            |   | 7  | 142.3 |
| Tpm1    | tropomyosin 1, alpha                                                                                   |   | 9  | 66.8  |
| Tpm2    | tropomyosin 2, beta                                                                                    |   | 4  | 43.5  |
| Trdn    | triadin                                                                                                |   | 10 | 32.8  |
| Trim54  | tripartite motif-containing 54                                                                         |   | 5  | 31.4  |

|         |                                         |    |       |
|---------|-----------------------------------------|----|-------|
| Trim63  | tripartite motif-containing 63          | 4  | 133.6 |
| Ttn     | Titin                                   | 2  | 76.7  |
| Txlnb   | taxilin beta                            | 10 | 17.5  |
| Uchl1   | ubiquitin carboxy-terminal hydrolase L1 | 5  | 67    |
| Vgll2   | vestigial like 2 homolog (Drosophila)   | 10 | 51.7  |
| Zmynd17 | zinc finger, MYND domain containing 17  | 14 | 19.3  |

## Supplementary Table 4

### Genes in the Hair Follicle eQTL network (Figure 2 in manuscript)

| Symbol     | Title                                                   | Chr | Mb    | Strongest QTL Locus | Raw QTL p-value | Permutation QTL p-value |
|------------|---------------------------------------------------------|-----|-------|---------------------|-----------------|-------------------------|
| Chac1      | ChaC, cation transport regulator-like 1 (E. coli)       | 2   | 119   | Chr 15, 84 Mb       | 7.88E-04        | 0.11                    |
| Crym       | crystallin, mu                                          | 7   | 120   | Chr. 10, 118 Mb     | 2.57E-04        | 0.06                    |
| Dlx3       | distal-less homeobox 3                                  | 11  | 94.9  | Chr. 10, 118 Mb     | 1.28E-03        | 0.18                    |
| Fbp1       | fructose biphosphatase 1                                | 13  | 62.9  | Chr. 3, 19 Mb       | 9.42E-04        | 0.19                    |
| Gprc5d     | G protein-coupled receptor, family C, group 5, member D | 6   | 135.1 | Chr. 3, 19 Mb       | 3.33E-04        | 0.08                    |
| Krt2-ps1   | keratin complex 2, basic, pseudogene 1                  | 15  | 101.3 | Chr. 3, 19 Mb       | 3.75E-04        | 0.08                    |
| Krt25      | keratin 25                                              | 11  | 99.1  | Chr. 3, 19 Mb       | 8.29E-04        | 0.11                    |
| Krt26      | keratin 26                                              | 11  | 99.1  | Chr. 15, 84 Mb      | 3.71E-04        | 0.08                    |
| Krt27      | keratin 27                                              | 11  | 99.2  | Chr. 15, 84 Mb      | 7.75E-04        | 0.11                    |
| Krt28      | keratin 28                                              | 11  | 99.2  | Chr. 3, 19 Mb       | 3.26E-04        | 0.1                     |
| Krt31      | keratin 31                                              | 11  | 99.9  | Chr. 3, 19 Mb       | 7.93E-04        | 0.14                    |
| Krt32      | keratin 32                                              | 11  | 99.9  | Chr. 10, 118 Mb     | 5.43E-04        | 0.1                     |
| Krt33a     | keratin 33A                                             | 11  | 99.8  | Chr. 3, 19 Mb       | 9.76E-04        | 0.14                    |
| Krt33b     | keratin 33B                                             | 11  | 99.8  | Chr. 10, 118 Mb     | 8.84E-04        | 0.13                    |
| Krt34      | keratin 34                                              | 11  | 99.9  | Chr. 3, 19 Mb       | 8.89E-04        | 0.15                    |
| Krt35      | keratin 35                                              | 11  | 99.9  | Chr. 10, 118 Mb     | 4.26E-04        | 0.11                    |
| Krt39      | keratin 39                                              | 11  | 99.9  | Chr. 10, 118 Mb     | 7.00E-04        | 0.13                    |
| Krt71      | keratin 71                                              | 15  | 101.6 | Chr. 10, 118 Mb     | 2.38E-04        | 0.06                    |
| Krt72      | keratin 72                                              | 15  | 101.6 | Chr. 3, 19 Mb       | 8.33E-04        | 0.16                    |
| Krt73      | keratin 73                                              | 15  | 101.6 | Chr. 10, 118 Mb     | 1.09E-04        | 0.02                    |
| Krt75      | keratin 75                                              | 15  | 101.4 | Chr. 10, 118 Mb     | 1.68E-04        | 0.05                    |
| Krt81      | keratin 81                                              | 15  | 101.3 | Chr. 3, 19 Mb       | 7.13E-04        | 0.11                    |
| Krt85      | keratin 85                                              | 15  | 101.3 | Chr. 10, 118 Mb     | 1.91E-04        | 0.08                    |
| Krtap10-4  | keratin associated protein 10-4                         | 10  | 77.2  | Chr. 10, 118 Mb     | 3.17E-04        | 0.06                    |
| Krtap12-1  | keratin associated protein 12-1                         | 10  | 77.2  | Chr. 3, 19 Mb       | 4.47E-04        | 0.07                    |
| Krtap13-1  | keratin associated protein 13-1                         | 16  | 88.6  | Chr. 3, 19 Mb       | 1.40E-03        | 0.16                    |
| Krtap14    | keratin associated protein 14                           | 16  | 88.7  | Chr. 3, 19 Mb       | 1.05E-03        | 0.17                    |
| Krtap15    | keratin associated protein 15                           | 16  | 88.7  | Chr. 3, 19 Mb       | 8.02E-04        | 0.14                    |
| Krtap16-1  | keratin associated protein 16-1                         | 16  | 88.8  | Chr. 3, 19 Mb       | 1.40E-03        | 0.18                    |
| Krtap16-10 | keratin associated protein 16-10                        | 16  | 88.9  | Chr. 10, 118 Mb     | 1.13E-03        | 0.17                    |
| Krtap16-5  | keratin associated protein 16-5                         | 16  | 88.8  | Chr. 3, 26 Mb       | 1.07E-03        | 0.18                    |
| Krtap17-1  | keratin associated protein 17-1                         | 11  | 99.8  | Chr. 3, 19 Mb       | 4.45E-04        | 0.08                    |
| Krtap2-4   | keratin associated protein 2-4                          | 11  | 99.4  | Chr. 3, 26 Mb       | 8.14E-04        | 0.16                    |
| Krtap26-1  | keratin associated protein 26-1                         | 16  | 88.6  | Chr. 3, 19 Mb       | 6.35E-04        | 0.08                    |
| Krtap4-7   | keratin associated protein 4-7                          | 11  | 99.5  | Chr. 3, 19 Mb       | 4.13E-04        | 0.11                    |
| Krtap5-1   | keratin associated protein 5-1                          | 7   | 142.1 | Chr. 10, 118 Mb     | 7.46E-04        | 0.13                    |
| Krtap5-2   | keratin associated protein 5-2                          | 7   | 142   | Chr. 3, 19 Mb       | 1.29E-03        | 0.14                    |
| Krtap5-4   | keratin associated protein 5-4                          | 7   | 142.1 | Chr. 3, 19 Mb       | 9.68E-04        | 0.12                    |

|          |                                                                                                  |    |       |                 |          |      |
|----------|--------------------------------------------------------------------------------------------------|----|-------|-----------------|----------|------|
| Krtap5-5 | Keratin associated protein 5-5                                                                   | 7  | 142   | Chr. 3, 19 Mb   | 5.59E-04 | 0.1  |
| Krtap6-1 | keratin associated protein 6-1                                                                   | 16 | 88.9  | Chr. 10, 118 Mb | 6.48E-04 | 0.1  |
| Krtap6-2 | keratin associated protein 6-2                                                                   | 16 | 89.3  | Chr. 10, 118 Mb | 9.53E-04 | 0.16 |
| Krtap8-1 | keratin associated protein 8-1                                                                   | 16 | 89.4  | Chr. 10, 118 Mb | 1.30E-03 | 0.16 |
| Krtap9-1 | keratin associated protein 9-1                                                                   | 11 | 99.7  | Chr. 10, 118 Mb | 2.77E-04 | 0.05 |
| Lap3     | leucine aminopeptidase 3<br>leucine rich repeat containing G                                     | 5  | 45.8  | Chr. 10, 118 Mb | 2.75E-04 | 0.06 |
| Lgr5     | protein coupled receptor 5                                                                       | 10 | 114.9 | Chr. 10, 118 Mb | 2.88E-04 | 0.06 |
| Lrrc15   | leucine rich repeat containing 15                                                                | 16 | 30.2  | Chr. 15, 84 Mb  | 2.87E-04 | 0.09 |
| Lrrc15   | leucine rich repeat containing 15<br>lymphocyte antigen 6 complex,<br>locus G6D                  | 16 | 30.2  | Chr. 15, 84 Mb  | 2.87E-04 | 0.09 |
| Ly6g6d   |                                                                                                  | 17 | 34.7  | Chr. 3, 19 Mb   | 1.82E-04 | 0.05 |
| Lyg2     | lysozyme, G-like 2                                                                               | 1  | 37.9  | Chr 3, 19 Mb    | 2.26E-04 | 0.05 |
| Msx2     | homeo box, msh-like 2                                                                            | 13 | 53.5  | Chr. 10, 118 Mb | 5.58E-04 | 0.07 |
| Padi1    | peptidyl arginine deiminase,<br>type I                                                           | 4  | 140.1 | Chr. 10, 118 Mb | 9.61E-04 | 0.12 |
| Padi3    | peptidyl arginine deiminase,<br>type III                                                         | 4  | 140.1 | Chr. 3, 19 Mb   | 4.66E-04 | 0.1  |
| Pdzn3    | PDZ domain containing RING<br>finger 3                                                           | 6  | 101.2 | Chr. 10, 118 Mb | 4.19E-04 | 0.08 |
| Procr    | protein C receptor, endothelial                                                                  | 2  | 155.4 | Chr 15, 24 Mb   | 1.27E-03 | 0.17 |
| Rab3ip   | RAB3A interacting protein                                                                        | 10 | 116.3 | Chr. 10, 118 Mb | 1.42E-05 | 0.01 |
| S100a3   | S100 calcium binding protein A3<br>solute carrier family 39 (metal<br>ion transporter), member 8 | 3  | 90.7  | Chr. 10, 118 Mb | 4.36E-04 | 0.12 |
| Slc39a8  | solute carrier family 40 (iron-<br>regulated transporter), member 8                              | 3  | 135.8 | Chr. 10, 118 Mb | 8.62E-04 | 0.16 |
| Slc40a1  | 1                                                                                                | 1  | 45.9  | Chr. 3, 19 Mb   | 1.10E-03 | 0.12 |
| Tchh     | Trichohyalin                                                                                     | 3  | 93.5  | Chr. 3, 19 Mb   | 4.67E-04 | 0.1  |
| Tchhl1   | trichohyalin-like 1                                                                              | 3  | 93.6  | Chr. 15, 84 Mb  | 6.65E-04 | 0.13 |
| Vsig8    | V-set and immunoglobulin<br>domain containing 8                                                  | 1  | 174.5 | Chr. 3, 19 Mb   | 9.63E-04 | 0.14 |

## Supplementary Table 5

### Non-synonymous changes in *Lgr5* sequence between SPRET/Ei and FVB/N

We sequenced the coding exons of *Lgr5* in SPRET/Ei and FVB/N and identified four polymorphisms between these species that result in amino acid changes:

| Lgr5 Amino Acid Location | FVB/N | Spretus | Human | Domain                |
|--------------------------|-------|---------|-------|-----------------------|
| 90                       | C     | R       | R     | Leucine-rich repeat 2 |
| 774                      | A     | T       | T     | Trans-membrane 6      |
| 813                      | S     | A       | A     | Trans-membrane 7      |
| 886                      | A     | S       | P     | C-terminal tail       |

## Supplementary Table 6

### Genes in the Haematopoietic eQTL Network (Figure 3A in manuscript)

| Symbol   | Title                                                                           | Chr | Mb    | Strongest QTL Locus | Raw QTL p-value | Permutation QTL pval |
|----------|---------------------------------------------------------------------------------|-----|-------|---------------------|-----------------|----------------------|
| Alas2    | aminolevulinic acid synthase 2, erythroid                                       | X   | 145.9 | Chr. 7, 86 Mb       | 0.001           | 0.08                 |
| Bpgm     | 2,3-bisphosphoglycerate mutase                                                  | 6   | 34.4  | Chr. 14, 116 Mb     | 0.001           | 0.12                 |
| Hba-a1   | hemoglobin alpha, adult chain 1                                                 | 11  | 32.2  | N.S.                | N.S.            | N.S.                 |
| Hbb-b1   | hemoglobin, beta adult major chain                                              | 7   | 103.7 | Chr 7, 63 Mb        | 0.002           | 0.242                |
| Isg20    | interferon-stimulated protein radical S-adenosyl methionine domain containing 2 | 7   | 78.8  | Chr. 7, 86 Mb       | 0.0018          | 0.13                 |
| Rsad2    | domain containing 2                                                             | 12  | 27.0  | Chr. 15, 101 Mb     | 0.0016          | 0.1                  |
| Sipar    | RIKEN cDNA 2810453106 gene                                                      | 5   | 143.8 | Chr. 7, 86 Mb       | 0.0001          | 0.01                 |
| Slc25a37 | solute carrier family 25, member 37                                             | 14  | 68.4  | Chr. 7, 63 Mb       | 0.002           | 0.18                 |
| Snca     | Synuclein, alpha                                                                | 6   | 60.7  | Chr. 7, 63 Mb       | 0.001           | 0.07                 |
| Spna1    | spectrin alpha 1                                                                | 1   | 176.0 | N.S.                | N.S.            | N.S.                 |

## Supplementary Table 7

### Genes in the Melanosomal Haematopoietic eQTL Network (Figure 3B in manuscript)

| Symbol | Title                             | Chr | Mb.   | Strongest QTL Locus | Raw QTL p-value | Permutation QTL p-value |
|--------|-----------------------------------|-----|-------|---------------------|-----------------|-------------------------|
| Dct    | dopachrome tautomerase            | 14  | 116.9 | NA                  | NA              | NA                      |
| Mcoln3 | mucopolin 3                       | 3   | 146.1 | Chr. 7, 79 Mb       | 0.001           | 0.15                    |
| Mlana  | melan-A                           | 19  | 29.8  | Chr. 13, 53 Mb      | 0.001           | 0.11                    |
| p      | pink-eyed dilution                | 7   | 56.1  | Chr. 13, 53 Mb      | 9.08E-05        | 0.01                    |
| Ptgds  | prostaglandin D2 synthase (brain) | 2   | 25.3  | Chr 2, 48 Mb        | NA              | NA                      |
| Si     | Silver                            | 10  | 128.1 | Chr 13, 53 Mb       | 0.003           | 0.31                    |
| Tyr    | tyrosinase                        | 7   | 87.3  | Chr. 7, 79 Mb       | 6.70E-05        | < 0.01                  |
| Tyrp1  | tyrosinase-related protein 1      | 4   | 80.3  | Chr. 13, 53 Mb      | 0.0014          | 0.2                     |

## Supplementary Table 8

**Genes differentially expressed between low-susceptibility mice (zero papillomas at 20 weeks) and high-susceptibility mice (eight or more papillomas at 20 weeks).** Genes listed first with gene symbol on a white background are higher in mice with eight or more papillomas; genes listed later on a green background are lower in that group (i.e. have inverse directionality with papilloma number).

| Gene          | Probe        | Title                                                   | Chr. | Mb.   | q-value |
|---------------|--------------|---------------------------------------------------------|------|-------|---------|
| Arg1          | 1419549_at   | arginase 1, liver                                       | 10   | 24.6  | 0.00    |
| Atp6v1b2      | 1419883_s_at | ATPase, H+ transporting, lysosomal V1 subunit B2        | 8    | 72    | 0.00    |
| 2810047C21Rik | 1453242_x_at | RIKEN cDNA 2810047C21 gene                              | 7    | 8.3   | 0.00    |
| Ndrp4         | 1436188_a_at | N-myc downstream regulated gene 4                       | 8    | 98.6  | 0.00    |
| Fert2         | 1421729_a_at | fer (fms/fps related) protein kinase, testis specific 2 | 17   | 63.6  | 0.00    |
| Sprr2d        | 1420771_at   | small proline-rich protein 2D                           | 3    | 92.4  | 0.00    |
| 3200002M19Rik | 1424327_at   | RIKEN cDNA 3200002M19 gene                              | 10   | 95.1  | 0.00    |
| 5930430L01Rik | 1445558_at   | RIKEN cDNA 5930430L01 gene                              | 5    | 149.3 | 0.00    |
| Trex2         | 1449367_at   | three prime repair exonuclease 2                        | X    | 69.7  | 0.00    |
| 2810047C21Rik | 1453241_a_at | RIKEN cDNA 2810047C21 gene                              | 7    | 8.3   | 0.00    |
| Cyp4f16       | 1430172_a_at | cytochrome P450, family 4, subfamily f, polypeptide 16  | 17   | 32.3  | 0.00    |

|               |              |                                                                                   |    |       |      |
|---------------|--------------|-----------------------------------------------------------------------------------|----|-------|------|
| Pp11r         | 1449938_at   | placental protein 11 related                                                      | 15 | 97.5  | 1.74 |
| Defb3         | 1421806_at   | defensin beta 3                                                                   | 8  | 19.3  | 1.74 |
| Atp6v0b       | 1416769_s_at | ATPase, H+ transporting, lysosomal V0 subunit B                                   | 4  | 117.4 | 1.74 |
| Slc37a2       | 1452492_a_at | solute carrier family 37 (glycerol-3-phosphate transporter), member 2             | 9  | 37    | 1.74 |
| Rptn          | 1420431_at   | repetin                                                                           | 3  | 93.5  | 1.74 |
| E2f1          | 1431875_a_at | E2F transcription factor 1                                                        | 2  | 154.3 | 1.74 |
| Glo1          | 1424108_at   | glyoxalase 1                                                                      | 2  | 35.2  | 1.74 |
| Ell2          | 1450744_at   | elongation factor RNA polymerase II 2                                             | 13 | 76.2  | 1.74 |
| Sprr2k        | 1422425_at   | small proline-rich protein 2K                                                     | 3  | 92.5  | 1.74 |
| Il1f5         | 1421370_a_at | interleukin 1 family, member 5 (delta)                                            | 2  | 24.1  | 1.74 |
| Mal2          | 1427042_at   | mal, T-cell differentiation protein 2                                             | 15 | 54.4  | 2.17 |
| Shmt2         | 1426423_at   | serine hydroxymethyl transferase 2 (mitochondrial)                                | 10 | 126.9 | 2.17 |
| Klk9          | 1431681_at   | kallikrein 9                                                                      | 7  | 43.7  | 2.17 |
| BC023179      | 1460381_at   | cDNA sequence BC023179                                                            | 7  | 6.9   | 2.17 |
| Slc35b4       | 1416548_at   | solute carrier family 35, member B4                                               | 6  | 34.1  | 2.17 |
| Gsta4         | 1416368_at   | glutathione S-transferase, alpha 4                                                | 9  | 78    | 2.17 |
| Gjb6          | 1448397_at   | gap junction membrane channel protein beta 6                                      | 14 | 56.1  | 2.17 |
| Thop1         | 1448907_at   | thimet oligopeptidase 1                                                           | 10 | 80.5  | 2.17 |
| Kctd4         | 1420537_at   | potassium channel tetramerisation domain containing 4                             | 14 | 74.7  | 2.17 |
| Il1f6         | 1418609_at   | interleukin 1 family, member 6                                                    | 2  | 24    | 2.17 |
| Gsdm2         | 1432141_x_at | gasdermin 2                                                                       | 11 | 98.5  | 2.17 |
| Gsta1         | 1421041_s_at | glutathione S-transferase, alpha 1 (Ya)                                           | 9  | 78    | 2.17 |
| Nphp1         | 1453686_x_at | nephronophthisis 1 (juvenile) homolog (human)                                     | 2  | 127.4 | 2.17 |
| Asns          | 1433966_x_at | asparagine synthetase                                                             | 1  | ?     | 2.17 |
| Blmh          | 1452101_at   | bleomycin hydrolase                                                               | 11 | 76.8  | 2.17 |
| Bad           | 1416582_a_at | Bcl-associated death promoter                                                     | 19 | 7     | 3.08 |
| Cdca8         | 1428481_s_at | cell division cycle associated 8                                                  | 4  | 124.4 | 3.08 |
| Mcm3          | 1426652_at   | minichromosome maintenance deficient 3 (S. cerevisiae)                            | 1  | 20.8  | 3.08 |
| Serpib12      | 1429297_at   | serine (or cysteine) peptidase inhibitor, clade B (ovalbumin), member 12          | 1  | 108.8 | 3.08 |
| Arnt2         | 1434028_at   | aryl hydrocarbon receptor nuclear translocator 2                                  | 7  | 84.1  | 3.08 |
| Sprr2i        | 1422963_at   | small proline-rich protein 2I                                                     | 3  | 92.5  | 3.08 |
| Il1f8         | 1425715_at   | interleukin 1 family, member 8                                                    | 2  | 24    | 3.08 |
| Nphp1         | 1416919_a_at | nephronophthisis 1 (juvenile) homolog (human)                                     | 2  | 127.4 | 3.08 |
| Cdc20         | 1439394_x_at | cell division cycle 20 homolog (S. cerevisiae)                                    | 4  | 117.9 | 3.08 |
| Lce3a         | 1456001_at   | similar to late cornified envelope protein                                        | 3  | 93    | 3.08 |
| Tmprss11a     | 1455848_at   | transmembrane protease, serine 11a                                                | 5  | 87.5  | 3.08 |
| Wdr62         | 1424849_at   | WD repeat domain 62                                                               | 7  | 29.9  | 3.08 |
| Cited4        | 1425400_a_at | Cbp/p300-interacting transactivator, with Glu/Asp-rich carboxy-terminal domain, 4 | 4  | 120.2 | 3.08 |
| Glrx          | 1416592_at   | glutaredoxin                                                                      | 13 | 76.3  | 3.08 |
| Rab25         | 1417738_at   | RAB25, member RAS oncogene family                                                 | 3  | 88.6  | 3.08 |
| Pon2          | 1429019_s_at | paraoxonase 2                                                                     | 6  | 5.2   | 3.12 |
| 8030443D09Rik | 1456186_at   | RIKEN cDNA 8030443D09 gene                                                        | 2  | 92.8  | 3.12 |
| Tubb3         | 1415978_at   | tubulin, beta 3                                                                   | 8  | 126.3 | 3.12 |
| Cdca7         | 1428069_at   | cell division cycle associated 7                                                  | 2  | 72.3  | 3.12 |
| Sdro          | 1456074_at   | orphan short chain dehydrogenase/reductase                                        | 10 | 127.3 | 3.12 |

|               |              |                                                                                                                                                      |    |       |      |
|---------------|--------------|------------------------------------------------------------------------------------------------------------------------------------------------------|----|-------|------|
| 2310002A05Rik | 1419317_x_at | RIKEN cDNA 2310002A05 gene                                                                                                                           | 3  | 93    | 3.12 |
| 6330442E10Rik | 1454632_at   | RIKEN cDNA 6330442E10 gene                                                                                                                           | 12 | 79.9  | 3.12 |
| Otop3         | 1429036_at   | otopetrin 3                                                                                                                                          | 11 | 115.2 | 3.12 |
| Lrrc28        | 1430145_at   | leucine rich repeat containing 28                                                                                                                    | 7  | 67.5  | 3.12 |
| Ttll1         | 1426427_at   | tubulin tyrosine ligase-like 1                                                                                                                       | 15 | 83.3  | 3.12 |
| Dnase1l2      | 1450936_a_at | deoxyribonuclease 1-like 2                                                                                                                           | 17 | 24.2  | 3.12 |
| 2310007F04Rik | 1429641_x_at | RIKEN cDNA 2310007F04 gene<br>solute carrier family 25 (mitochondrial<br>carrier, adenine nucleotide translocator),<br>member 5                      | 3  | 93    | 3.12 |
| Slc25a5       | 1438360_x_at |                                                                                                                                                      | X  | 33.2  | 3.12 |
| Tdh           | 1449064_at   | L-threonine dehydrogenase                                                                                                                            | 2  | 111.8 | 3.12 |
| 6330442E10Rik | 1457254_x_at | RIKEN cDNA 6330442E10 gene                                                                                                                           | 12 | 79.9  | 3.12 |
| Ptk6          | 1450271_at   | PTK6 protein tyrosine kinase 6<br>SH3 domain binding glutamic acid-rich<br>protein-like 3                                                            | 2  | 181.1 | 3.12 |
| Sh3bgrl3      | 1416528_at   |                                                                                                                                                      | 4  | 133.4 | 3.12 |
| 1110058A15Rik | 1449902_at   | RIKEN cDNA 1110058A15 gene                                                                                                                           | 3  | 92.8  | 3.12 |
| Rpa2          | 1416433_at   | replication protein A2                                                                                                                               | 4  | 132   | 3.12 |
| Tmem54        | 1417895_a_at | transmembrane protein 54<br>nephronophthisis 1 (juvenile) homolog<br>(human)                                                                         | 4  | 128.6 | 3.12 |
| Nphp1         | 1448523_at   |                                                                                                                                                      | 2  | 127.4 | 3.52 |
| 2810047C21Rik | 1431364_a_at | RIKEN cDNA 2810047C21 gene<br>nudix (nucleoside diphosphate linked<br>moiety X)-type motif 22                                                        | 7  | 8.3   | 3.52 |
| Nudt22        | 1460358_s_at |                                                                                                                                                      | 19 | 7.1   | 3.52 |
| AI043046      | 1443594_at   | expressed sequence AI043046<br>ankyrin repeat and SOCS box-containing<br>protein 13                                                                  | 13 | 76.3  | 3.52 |
| Asb13         | 1419401_at   |                                                                                                                                                      | 13 | 3.6   | 3.52 |
| Tmem141       | 1435258_at   | transmembrane protein 141                                                                                                                            | 2  | 25.4  | 3.52 |
| Ptk6          | 1442923_at   | PTK6 protein tyrosine kinase 6                                                                                                                       | 2  | 181.1 | 3.52 |
| Ak2           | 1448451_at   | adenylate kinase 2                                                                                                                                   | 4  | 128.5 | 3.52 |
| Atp13a4       | 1438707_at   | ATPase type 13A4                                                                                                                                     | 16 | 29.3  | 3.52 |
| Aox4          | 1419215_at   | aldehyde oxidase 4                                                                                                                                   | 1  | 58.2  | 3.52 |
| Sprr2h        | 1422240_s_at | small proline-rich protein 2H                                                                                                                        | 3  | 92.5  | 3.52 |
| Stfa3         | 1419709_at   | stefin A3<br>eosinophil-associated, ribonuclease A<br>family, member 5                                                                               | 16 | 36.4  | 3.52 |
| Ear5          | 1450616_at   |                                                                                                                                                      | 14 | 50.1  | 3.52 |
| Mcm6          | 1416251_at   | minichromosome maintenance deficient 6<br>(MIS5 homolog, <i>S. pombe</i> ) ( <i>S. cerevisiae</i> )<br>sphingomyelin phosphodiesterase 3,<br>neutral | 1  | 130.2 | 3.52 |
| Smpd3         | 1422779_at   |                                                                                                                                                      | 8  | 109.1 | 3.52 |
| Calm4         | 1450633_at   | calmodulin 4                                                                                                                                         | 13 | 3.8   | 3.52 |
| Ndufa4        | 1424085_at   | NADH dehydrogenase (ubiquinone) 1<br>alpha subcomplex, 4                                                                                             | 6  | 11.9  | 3.97 |
| Ect2          | 1419513_a_at | ect2 oncogene                                                                                                                                        | 3  | 27.3  | 3.97 |
| Atp6v0b       | 1437013_x_at | ATPase, H+ transporting, lysosomal V0<br>subunit B<br>mitochondrial trans-2-enoyl-CoA<br>reductase                                                   | 4  | 117.4 | 3.97 |
| Mecr          | 1417097_at   |                                                                                                                                                      | 4  | 131.1 | 3.97 |
| Ndufc1        | 1448284_a_at | NADH dehydrogenase (ubiquinone) 1,<br>subcomplex unknown, 1                                                                                          | 3  | 51.5  | 3.97 |
| Krt78         | 1438849_at   | Keratin 78<br>bactericidal/permeability-increasing<br>protein-like 2                                                                                 | 15 | 101.8 | 3.97 |
| Bpil2         | 1437232_at   |                                                                                                                                                      | 10 | 85.4  | 3.97 |
| Lypd3         | 1417942_at   | Ly6/Plaur domain containing 3<br>solute carrier family 25 (mitochondrial<br>carrier, adenine nucleotide translocator),<br>member 5                   | 7  | 24.3  | 3.97 |
| Slc25a5       | 1438545_at   |                                                                                                                                                      | 5  | 97.5  | 3.97 |
| Slc5a9        | 1439494_at   | solute carrier family 5 (sodium/glucose<br>cotransporter), member 9                                                                                  | 4  | 111.4 | 3.97 |
| Sult2b1       | 1417335_at   | sulfotransferase family, cytosolic, 2B,<br>member 1                                                                                                  | 7  | 45.6  | 3.97 |

|               |              |                                                                                             |    |       |      |
|---------------|--------------|---------------------------------------------------------------------------------------------|----|-------|------|
| Scd2          | 1415823_at   | stearoyl-Coenzyme A desaturase 2                                                            | 19 | 44.3  | 3.97 |
| Pon2          | 1450686_at   | paraoxonase 2                                                                               | 6  | 5.2   | 3.97 |
| Clsfn         | 1456280_at   | claspin homolog ( <i>Xenopus laevis</i> )                                                   | 4  | 126.1 | 4.45 |
| Mtmr6         | 1425486_s_at | myotubularin related protein 6                                                              | 14 | 59.2  | 4.45 |
| Galnt3        | 1417588_at   | UDP-N-acetyl-alpha-D-galactosamine:polypeptide N-acetylgalactosaminyltransferase 3          | 2  | 65.9  | 4.45 |
| Ppp1r3d       | 1452922_at   | protein phosphatase 1, regulatory subunit 3D                                                | 2  | 178.3 | 4.45 |
| Aprt          | 1423801_a_at | adenine phosphoribosyl transferase                                                          | 8  | 125.5 | 4.45 |
| Asns          | 1451095_at   | asparagine synthetase                                                                       | 6  | 7.6   | 4.45 |
| Ccdc22        | 1455805_x_at | coiled-coil domain containing 22                                                            | 2  | ?     | 4.45 |
| Gna15         | 1421302_a_at | guanine nucleotide binding protein, alpha 15                                                | 10 | 80.9  | 4.45 |
| Cklf          | 1425769_x_at | chemokine-like factor                                                                       | 8  | 107.1 | 4.45 |
| Prim1         | 1418369_at   | DNA primase, p49 subunit                                                                    | 10 | 127.4 | 4.45 |
| Ptk9          | 1420874_at   | protein tyrosine kinase 9                                                                   | 15 | 94.4  | 4.45 |
| Nek2          | 1437580_s_at | NIMA (never in mitosis gene a)-related expressed kinase 2                                   | 1  | 193.5 | 4.45 |
| Tpd52         | 1419494_a_at | tumor protein D52                                                                           | 3  | 8.9   | 4.45 |
| Glo1          | 1451240_a_at | glyoxalase 1                                                                                | 2  | 35.2  | 4.45 |
| Pp11r         | 1449937_at   | placental protein 11 related                                                                | 15 | 97.5  | 4.45 |
| Serpnb3a      | 1437517_x_at | serine (or cysteine) peptidase inhibitor, clade B (ovalbumin), member 3A                    | 1  | 108.9 | 4.45 |
| RP23-219P13.3 | 1455973_at   | hypothetical protein LOC626870                                                              | 11 | 9     | 4.45 |
| 2810433K01Rik | 1450496_a_at | RIKEN cDNA 2810433K01 gene                                                                  | 18 | 74.3  | 4.45 |
| Fdft1         | 1438322_x_at | farnesyl diphosphate farnesyl transferase 1                                                 | 14 | 17.3  | 4.45 |
| Sprr1b        | 1422672_at   | small proline-rich protein 1B                                                               | 3  | 92.5  | 4.45 |
| Krt6b         | 1422588_at   | keratin 6B                                                                                  | 15 | 101.5 | 4.45 |
| Susd5         | 1438636_s_at | sushi domain containing 5                                                                   | 9  | 113.9 | 4.45 |
| Rbp2          | 1422846_at   | retinol binding protein 2, cellular exportin, tRNA (nuclear export receptor for tRNAs)      | 9  | 98.3  | 4.45 |
| Xpot          | 1441682_s_at |                                                                                             | 10 | 121   | 4.45 |
| Aurkb         | 1424128_x_at | aurora kinase B                                                                             | 11 | 68.9  | 4.45 |
| Cdkn3         | 1430574_at   | cyclin-dependent kinase inhibitor 3                                                         | 14 | 45.7  | 4.45 |
| Wfdc5         | 1425418_at   | WAP four-disulfide core domain 5                                                            | 2  | 163.9 | 4.45 |
| Kns2          | 1417005_at   | kinesin 2                                                                                   | 12 | 112.2 | 4.45 |
| 2010315L10Rik | 1453430_at   | RIKEN cDNA 2010315L10 gene                                                                  | 8  | 74.3  | 4.45 |
| Uchl3         | 1449855_s_at | ubiquitin carboxyl-terminal esterase L3 (ubiquitin thiolesterase)                           | 14 | 100.5 | 4.45 |
| Pla2g4e       | 1429862_at   | phospholipase A2, group IVE                                                                 | 2  | 119.9 | 5.89 |
| Slc25a5       | 1438922_x_at | solute carrier family 25 (mitochondrial carrier, adenine nucleotide translocator), member 5 | X  | 33.2  | 5.89 |
| Qpct          | 1426622_a_at | glutaminyl-peptide cyclotransferase (glutaminyl cyclase)                                    | 17 | 79    | 5.89 |
| 1500031L02Rik | 1417840_at   | RIKEN cDNA 1500031L02 gene                                                                  | 16 | 32    | 5.89 |
| Ndrg4         | 1426615_s_at | N-myc downstream regulated gene 4                                                           | 8  | 98.6  | 5.89 |
| Ppil5         | 1452458_s_at | peptidylprolyl isomerase (cyclophilin) like 5                                               | 12 | 70.1  | 5.89 |
| Cdc20         | 1416664_at   | cell division cycle 20 homolog ( <i>S. cerevisiae</i> )                                     | 4  | 117.9 | 5.89 |
| Rnf11         | 1442048_at   | ring finger protein 11                                                                      | 4  | 108.9 | 5.89 |
| Nkpd1         | 1430087_at   | NTPase, KAP family P-loop domain containing 1                                               | 7  | 18.7  | 5.89 |
| 1456672_at    | 1456672_at   | CDNA, clone:Y1G0143G21, strand:unspecified                                                  | 17 | ?     | 5.89 |
| 3000002C10Rik | 1431997_at   | RIKEN cDNA 3000002C10 gene                                                                  | 9  | 109.7 | 5.89 |

|               |              |                                                                                                           |    |       |      |
|---------------|--------------|-----------------------------------------------------------------------------------------------------------|----|-------|------|
| Tgm5          | 1430142_at   | transglutaminase 5                                                                                        | 2  | 120.7 | 5.89 |
| Ada           | 1417976_at   | adenosine deaminase                                                                                       | 2  | 163.4 | 5.89 |
| St3gal6       | 1447841_x_at | ST3 beta-galactoside alpha-2,3-sialyltransferase 6                                                        | 16 | 58.4  | 5.89 |
| Mcm3          | 1426653_at   | minichromosome maintenance deficient 3 (S. cerevisiae)                                                    | 1  | 20.8  | 5.89 |
| 2510005D08Rik | 1449072_a_at | RIKEN cDNA 2510005D08 gene                                                                                | 14 | 56.5  | 5.89 |
| 4833423E24Rik | 1439528_at   | RIKEN cDNA 4833423E24 gene                                                                                | 2  | 85.3  | 5.89 |
| Sass6         | 1448016_at   | spindle assembly 6 homolog (C. elegans)                                                                   | 3  | 116.6 | 5.89 |
| Degs2         | 1424549_at   | degenerative spermatocyte homolog 2 (Drosophila), lipid desaturase                                        | 12 | 109.1 | 5.89 |
| Elovl1        | 1425676_a_at | elongation of very long chain fatty acids (FEN1/Elo2, SUR4/Elo3, yeast)-like 1                            | 4  | 117.9 | 5.89 |
| Camk2n2       | 1429204_at   | calcium/calmodulin-dependent protein kinase II inhibitor 2                                                | 16 | 20.5  | 5.89 |
| Pla2g2f       | 1421325_at   | phospholipase A2, group IIF                                                                               | 4  | 138   | 5.89 |
| Rabep2        | 1425602_a_at | rabaptin, RAB GTPase binding effector protein 2                                                           | 7  | 126.2 | 5.89 |
| Nlk           | 1435970_at   | nemo like kinase                                                                                          | 2  | 87    | 5.89 |
| Higd1a        | 1416480_a_at | HIG1 domain family, member 1A                                                                             | 9  | 121.7 | 5.89 |
| Nsg2          | 1416107_at   | neuron specific gene family member 2                                                                      | 11 | 31.9  | 5.89 |
| Nup43         | 1432187_at   | nucleoporin 43                                                                                            | 10 | 7.4   | 5.89 |
| Mrpl28        | 1456313_x_at | mitochondrial ribosomal protein L28                                                                       | 17 | 25.9  | 5.89 |
| Cnfn          | 1429540_at   | cornifelin                                                                                                | 7  | 25.1  | 5.89 |
| Igk-V21-12    | 1425738_at   | immunoglobulin kappa chain variable 21 (V21)-12                                                           | 6  | 70.5  | 5.89 |
| Thtpa         | 1433436_s_at | thiamine triphosphatase                                                                                   | 14 | 54.1  | 5.89 |
| 1436092_at    | 1436092_at   | Transcribed locus, moderately similar to XP_574723.1 PREDICTED: similar to LRRGT00097 [Rattus norvegicus] | 15 | 75.6  | 5.89 |
| Tnpo3         | 1453124_at   | transportin 3                                                                                             | 6  | 29.5  | 5.89 |
| E430028B21Rik | 1443869_at   | RIKEN cDNA E430028B21 gene                                                                                | 14 | 25.5  | 5.89 |
| Srxn1         | 1426875_s_at | sulfiredoxin 1 homolog (S. cerevisiae)                                                                    | 2  | 151.8 | 5.89 |
| Mlkl          | 1429570_at   | mixed lineage kinase domain-like                                                                          | 8  | 114.2 | 5.89 |
| 2610036D13Rik | 1427080_at   | RIKEN cDNA 2610036D13 gene                                                                                | 2  | 157.7 | 5.89 |
| Etv6          | 1423401_at   | ets variant gene 6 (TEL oncogene)                                                                         | 6  | 134   | 5.89 |
| S100a8        | 1419394_s_at | S100 calcium binding protein A8 (calgranulin A)                                                           | 3  | 90.8  | 5.89 |
| Csta          | 1435760_at   | cystatin A                                                                                                | 18 | 42.3  | 5.89 |
| 5730494M16Rik | 1459875_x_at | RIKEN cDNA 5730494M16 gene                                                                                | 18 | 25.3  | 5.89 |
| Rhod          | 1419061_at   | ras homolog gene family, member D                                                                         | 19 | 4.4   | 5.89 |
| Scd2          | 1415822_at   | stearoyl-Coenzyme A desaturase 2                                                                          | 19 | 44.3  | 5.89 |
| Zcchc17       | 1452084_at   | zinc finger, CCHC domain containing 17                                                                    | 4  | 129.8 | 5.89 |
| Ccdc5         | 1424955_at   | coiled-coil domain containing 5                                                                           | 18 | 78    | 5.89 |
| Lig3          | 1423419_at   | ligase III, DNA, ATP-dependent                                                                            | 11 | 82.6  | 5.89 |
| Tardbp        | 1423723_s_at | TAR DNA binding protein                                                                                   | 4  | 147.5 | 5.89 |
| Krt1          | 1422481_at   | keratin 1                                                                                                 | 15 | 101.7 | 5.89 |
| Slc28a3       | 1419570_at   | solute carrier family 28 (sodium-coupled nucleoside transporter), member 3                                | 13 | 58.6  | 5.89 |
| Cks1b         | 1416698_a_at | CDC28 protein kinase 1b                                                                                   | 3  | 89.5  | 5.89 |
| Lce1f         | 1420550_at   | RIKEN cDNA 1110055J05 gene                                                                                | 3  | 92.8  | 6.96 |
| Mcm5          | 1436808_x_at | minichromosome maintenance deficient 5, cell division cycle 46 (S. cerevisiae)                            | 8  | 78    | 6.96 |
| Aars          | 1423685_at   | alanyl-tRNA synthetase                                                                                    | 8  | 113.9 | 6.96 |
| Slc5a1        | 1455431_at   | solute carrier family 5 (sodium/glucose cotransporter), member 1                                          | 5  | 33.5  | 6.96 |
| Rab32         | 1416527_at   | RAB32, member RAS oncogene family                                                                         | 10 | 10.2  | 6.96 |



|               |              |                                                                                                                     |    |       |      |
|---------------|--------------|---------------------------------------------------------------------------------------------------------------------|----|-------|------|
| Slc25a5       | 1438546_x_at | solute carrier family 25 (mitochondrial carrier, adenine nucleotide translocator), member 5                         | 5  | 97.5  | 6.96 |
| Ckmt1         | 1432418_a_at | creatine kinase, mitochondrial 1, ubiquitous                                                                        | 2  | 121.1 | 6.96 |
| Kifc1         | 1449877_s_at | kinesin family member C1                                                                                            | 17 | 26.6  | 6.96 |
| Kif20a        | 1449207_a_at | kinesin family member 20A                                                                                           | 18 | 34.7  | 6.96 |
| Brrn1         | 1423920_at   | barren homolog (Drosophila)                                                                                         | 2  | 126.8 | 6.96 |
| Sh3kbp1       | 1431592_a_at | SH3-domain kinase binding protein 1                                                                                 | X  | 155.3 | 6.96 |
| Tuba4         | 1417374_at   | tubulin, alpha 4                                                                                                    | 1  | 75.1  | 6.96 |
| Nthl1         | 1419433_at   | nth (endonuclease III)-like 1 (E.coli)                                                                              | 17 | 24.4  | 6.96 |
| Cdca1         | 1430811_a_at | cell division cycle associated 1                                                                                    | 1  | 171.3 | 6.96 |
| 1500026D16Rik | 1435733_x_at | RIKEN cDNA 1500026D16 gene                                                                                          | 19 | 5.6   | 6.96 |
| Krt16         | 1448932_at   | keratin 16                                                                                                          | 11 | 100.1 | 6.96 |
| Rab11a        | 1449256_a_at | RAB11a, member RAS oncogene family                                                                                  | 9  | 64.5  | 6.96 |
| 2610528J11Rik | 1450947_at   | RIKEN cDNA 2610528J11 gene                                                                                          | 4  | 118   | 6.96 |
| Tgm1          | 1451416_a_at | transglutaminase 1, K polypeptide minichromosome maintenance deficient 5, cell division cycle 46 (S. cerevisiae)    | 14 | 54.7  | 6.96 |
| Mcm5          | 1415945_at   | microtubule associated serine/threonine kinase-like                                                                 | 8  | 78    | 6.96 |
| Mastl         | 1423525_at   | budding uninhibited by benzimidazoles 1 homolog (S. cerevisiae)                                                     | 2  | 22.9  | 6.96 |
| Bub1          | 1424046_at   | RIKEN cDNA 9630033F20 gene                                                                                          | 2  | 127.5 | 7.41 |
| 9630033F20Rik | 1447934_at   | budding uninhibited by benzimidazoles 1 homolog, beta (S. cerevisiae)                                               | 6  | 127.1 | 7.41 |
| Bub1b         | 1416961_at   | RIKEN cDNA 2610510J17 gene                                                                                          | 2  | 118.3 | 7.41 |
| 2610510J17Rik | 1427105_at   | septin 8                                                                                                            | 8  | 119.8 | 7.41 |
| Sept8         | 1426802_at   | RIKEN cDNA 5730494M16 gene                                                                                          | 11 | 53.4  | 7.41 |
| 5730494M16Rik | 1428189_at   | amyotrophic lateral sclerosis 2 (juvenile) chromosome region, candidate 12 (human)                                  | 18 | 25.3  | 7.41 |
| Als2cr12      | 1439758_at   | stearoyl-Coenzyme A desaturase 2                                                                                    | 1  | 58.6  | 7.41 |
| Scd2          | 1415824_at   | PDZK1 interacting protein 1                                                                                         | 19 | 44.3  | 7.41 |
| Pdzk1ip1      | 1455477_s_at | regulator of G-protein signaling 19                                                                                 | 4  | 114.6 | 7.41 |
| Rgs19         | 1434940_x_at | keratin 6A                                                                                                          | 2  | 181.6 | 7.41 |
| Krt6a         | 1427700_x_at | PYD and CARD domain containing                                                                                      | 15 | 101.5 | 7.41 |
| Pycard        | 1417346_at   | stefin A3                                                                                                           | 7  | 127.8 | 7.41 |
| Stfa3         | 1435761_at   | interleukin 1 family, member 9                                                                                      | 16 | 36.2  | 8.51 |
| Il1f9         | 1425958_at   | WAP four-disulfide core domain 12                                                                                   | 2  | 24    | 8.51 |
| Wfdc12        | 1449191_at   | NHS-like 1                                                                                                          | 2  | 163.9 | 8.51 |
| Nhsl1         | 1438904_at   | argininosuccinate lyase                                                                                             | 10 | 18.2  | 8.51 |
| Asl           | 1448350_at   | hematological and neurological expressed sequence 1                                                                 | 5  | 130.3 | 8.51 |
| Hn1           | 1448180_a_at | RIKEN cDNA 2410018C20 gene                                                                                          | 11 | 115.3 | 8.51 |
| 2410018C20Rik | 1417146_at   | split hand/foot malformation (ectrodactyly) type 1                                                                  | 8  | 87.1  | 8.51 |
| Shfm1         | 1418575_at   | Widely-interspaced zinc finger motifs 0 day neonate head cDNA, RIKEN full-length enriched library, clone:4833418G05 | 6  | 6.5   | 8.51 |
| Wiz           | 1434280_at   | product:unclassifiable, full insert sequence                                                                        | 6  | ?     | 8.51 |
| 1458519_at    | 1458519_at   | PDZK1 interacting protein 1                                                                                         | 13 | 35.6  | 8.51 |
| Pdzk1ip1      | 1417689_a_at | polymerase (DNA-directed), delta 3, accessory subunit                                                               | 4  | 114.6 | 8.51 |
| Pold3         | 1443733_x_at | cDNA sequence BC038331                                                                                              | 7  | 100   | 8.51 |
| BC038331      | 1458295_at   | RAN GTPase activating protein 1                                                                                     | 3  | 88.4  | 8.51 |
| Rangap1       | 1451092_a_at | geminin                                                                                                             | 15 | 81.5  | 8.51 |
| Gmnn          | 1417506_at   |                                                                                                                     | 13 | 24.8  | 8.51 |

|               |              |                                                                                                                       |    |       |      |
|---------------|--------------|-----------------------------------------------------------------------------------------------------------------------|----|-------|------|
| Pttg1         | 1438390_s_at | pituitary tumor-transforming 1                                                                                        | 11 | 43.3  | 8.51 |
| 4921525H12Rik | 1440249_at   | RIKEN cDNA 4921525H12 gene                                                                                            | 3  | 108.9 | 8.51 |
| Dsc1          | 1421460_at   | desmocollin 1                                                                                                         | 18 | 20.2  | 8.51 |
| Maf           | 1456060_at   | avian musculoaponeurotic fibrosarcoma (v-maf) AS42 oncogene homolog ER degradation enhancer, mannosidase alpha-like 1 | 8  | 118.6 | 8.51 |
| Edem1         | 1424065_at   | similar to aplysia ras-related homolog A2                                                                             | 6  | 108.8 | 8.51 |
| LOC433749     | 1450632_at   | similar to aplysia ras-related homolog A2                                                                             | 4  | 117.2 | 8.51 |
| 1190003J15Rik | 1431786_s_at | RIKEN cDNA 1190003J15 gene                                                                                            | 7  | 140.7 | 8.51 |
| Krt6a         | 1422783_a_at | keratin 6A                                                                                                            | 15 | 101.5 | 8.51 |
| Dars2         | 1433838_at   | aspartyl-tRNA synthetase 2 (mitochondrial)                                                                            | 1  | 162.9 | 8.51 |
| 2310042E22Rik | 1423494_at   | RIKEN cDNA 2310042E22 gene                                                                                            | 16 | 20.8  | 8.51 |
| 9930013L23Rik | 1429987_at   | RIKEN cDNA 9930013L23 gene                                                                                            | 7  | 83.8  | 9.15 |
| Coro1c        | 1449660_s_at | coronin, actin binding protein 1C                                                                                     | 5  | 114.1 | 9.15 |
| 1110051B16Rik | 1445710_x_at | RIKEN cDNA 1110051B16 gene                                                                                            | 14 | 25.1  | 9.15 |
| Paqr4         | 1423101_at   | progesterin and adipoQ receptor family member IV                                                                      | 17 | 23.5  | 9.15 |
| Them5         | 1431211_s_at | thioesterase superfamily member 5                                                                                     | 3  | 94.4  | 9.15 |
| 2810405K02Rik | 1423266_at   | RIKEN cDNA 2810405K02 gene                                                                                            | 4  | 153.7 | 9.15 |
| BC057079      | 1435209_at   | cDNA sequence BC057079                                                                                                | 4  | 87.8  | 9.15 |
| Alox8         | 1425376_at   | arachidonate 8-lipoxygenase                                                                                           | 11 | 69    | 9.15 |
| Tfb1m         | 1449749_s_at | transcription factor B1, mitochondrial                                                                                | 17 | 3.5   | 9.15 |
| Vps24         | 1428165_at   | vacuolar protein sorting 24 (yeast)                                                                                   | 6  | 71.5  | 9.15 |
| Dynl1         | 1448682_at   | dynein light chain LC8-type 1                                                                                         | 5  | 115.6 | 9.15 |
| Melk          | 1416558_at   | maternal embryonic leucine zipper kinase                                                                              | 4  | 44.3  | 9.15 |
| Ptk9          | 1420873_at   | protein tyrosine kinase 9                                                                                             | 15 | 94.4  | 9.15 |
| 1700123O20Rik | 1416917_at   | RIKEN cDNA 1700123O20 gene                                                                                            | 14 | 53.6  | 9.15 |
| Gjb2          | 1423271_at   | gap junction membrane channel protein beta 2                                                                          | 14 | 56.1  | 9.15 |
| Mettl1        | 1439155_at   | methyltransferase-like 1                                                                                              | 10 | 126.4 | 9.15 |
| Bace2         | 1416673_at   | beta-site APP-cleaving enzyme 2                                                                                       | 16 | 97.5  | 9.15 |
| Phgdh         | 1426658_x_at | 3-phosphoglycerate dehydrogenase                                                                                      | 3  | 65.7  | 9.15 |
| Hmgb2         | 1437313_x_at | high mobility group box 2 branched chain ketoacid dehydrogenase                                                       | 4  | 145.9 | 9.15 |
| Bckdk         | 1460644_at   | kinase                                                                                                                | 7  | 127.7 | 9.15 |
| Ccnb2         | 1450920_at   | cyclin B2                                                                                                             | 9  | 70.2  | 9.15 |
| Cdca8         | 1436847_s_at | cell division cycle associated 8                                                                                      | 4  | 124.4 | 9.15 |
| Ck1f          | 1451374_x_at | chemokine-like factor                                                                                                 | 8  | 107.1 | 9.15 |
| Aebp2         | 1437743_at   | AE binding protein 2                                                                                                  | 6  | 140.6 | 9.15 |
| Syce2         | 1429270_a_at | synaptonemal complex central element protein 2                                                                        | 8  | 87.8  | 9.15 |
| Nhs1          | 1426934_at   | NHS-like 1                                                                                                            | 10 | 18.2  | 0.00 |
| Mt1           | 1451612_at   | metallothionein 1                                                                                                     | 8  | 97.1  | 0.00 |
| Pde4b         | 1422474_at   | phosphodiesterase 4B, cAMP specific                                                                                   | 4  | 101.8 | 0.00 |
| Als2cr19      | 1445377_at   | Amyotrophic lateral sclerosis 2 (juvenile) chromosome region, candidate 19 (human)                                    | 1  | 61.7  | 2.17 |
| Prickle2      | 1428808_at   | prickle-like 2 (Drosophila)                                                                                           | 6  | 92.3  | 2.17 |
| AW214353      | 1454923_at   | expressed sequence AW214353                                                                                           | 6  | ?     | 2.17 |
| LOC669490     | 1457273_at   | similar to odd Oz/ten-m homolog 2                                                                                     | 11 | 35.9  | 2.17 |
| Vdr           | 1418176_at   | vitamin D receptor                                                                                                    | 15 | 97.7  | 3.34 |
| Bcl6          | 1421818_at   | B-cell leukemia/lymphoma 6                                                                                            | 16 | 23.9  | 5.89 |
| Msl211        | 1429109_at   | male-specific lethal 2-like 1 (Drosophila)                                                                            | 9  | 101   | 5.89 |
| Dopey1        | 1435295_at   | dopey family member 1                                                                                                 | 9  | 86.4  | 5.89 |

|               |              |                                                                                    |    |       |      |
|---------------|--------------|------------------------------------------------------------------------------------|----|-------|------|
| Mgat5         | 1428644_at   | mannoside acetylglucosaminyltransferase 5                                          | 1  | 129.3 | 5.89 |
| Npas2         | 1421037_at   | neuronal PAS domain protein 2                                                      | 1  | 39.1  | 6.96 |
| Pdlim5        | 1442710_at   | PDZ and LIM domain 5                                                               | 3  | 142.3 | 6.96 |
| Tera          | 1448126_at   | teratocarcinoma expressed, serine rich                                             | 14 | 118.4 | 6.96 |
| Pim3          | 1437100_x_at | proviral integration site 3                                                        | 15 | 88.7  | 6.96 |
| Hdac11        | 1454803_a_at | histone deacetylase 11                                                             | 6  | 91.1  | 6.96 |
| Sf1           | 1423750_a_at | Splicing factor 1                                                                  | 19 | 6.4   | 7.41 |
| BC035295      | 1434532_at   | cDNA sequence BC035295                                                             | 15 | 100.3 | 7.41 |
| Csnk1g3       | 1429383_at   | casein kinase 1, gamma 3                                                           | 18 | 54    | 7.41 |
| Pdik11        | 1437175_at   | PDLIM1 interacting kinase 1 like                                                   | 4  | 133.5 | 7.41 |
| Tbc1d8        | 1416996_at   | TBC1 domain family, member 8                                                       | 1  | 39.3  | 7.41 |
| Ahr           | 1422631_at   | aryl-hydrocarbon receptor                                                          | 12 | 36.1  | 7.41 |
| Acvr2a        | 1451004_at   | activin receptor IIA                                                               | 2  | 48.6  | 7.41 |
| Btbd7         | 1432910_at   | BTB (POZ) domain containing 7                                                      | 2  | ?     | 7.41 |
| Clk4          | 1422886_a_at | CDC like kinase 4                                                                  | 11 | 51.1  | 7.41 |
| Ubr1          | 1458033_at   | Ubiquitin protein ligase E3 component n-recognin 1                                 | 2  | 120.6 | 7.41 |
| Cuedc1        | 1451447_at   | CUE domain containing 1                                                            | 11 | 88    | 7.41 |
| Gatad2b       | 1437474_at   | GATA zinc finger domain containing 2B                                              | 3  | 90.4  | 7.41 |
| N28178        | 1441610_at   | expressed sequence N28178                                                          | 4  | 43    | 8.51 |
| Api5          | 1443112_at   | apoptosis inhibitor 5                                                              | 2  | 94.2  | 8.51 |
| Grasp         | 1441894_s_at | GRP1 (general receptor for phosphoinositides 1)-associated scaffold protein        | 15 | 101.1 | 8.51 |
| Amid          | 1431143_x_at | apoptosis-inducing factor (AIF)-like mitochondrion-associated inducer of death     | 10 | 61.1  | 8.51 |
| Tgfbr3        | 1447314_at   | Transforming growth factor, beta receptor III                                      | 5  | 107.4 | 8.51 |
| Hdgfrp3       | 1435977_at   | hepatoma-derived growth factor, related protein 3                                  | 7  | 81.8  | 8.51 |
| Foxp1         | 1421142_s_at | forkhead box P1                                                                    | 6  | 98.9  | 8.51 |
| Myo9a         | 1444541_at   | Myosin IXa                                                                         | 9  | 59.6  | 8.51 |
| Syde2         | 1437424_at   | synapse defective 1, Rho GTPase, homolog 2 (C. elegans)                            | 3  | 146   | 8.51 |
| Mll3          | 1434179_at   | myeloid/lymphoid or mixed-lineage leukemia 3                                       | 5  | 24.8  | 8.51 |
| Odz2          | 1420718_at   | odd Oz/ten-m homolog 2 (Drosophila)                                                | 11 | 35.9  | 8.51 |
| Prkx          | 1424286_at   | protein kinase, X-linked                                                           | X  | 74    | 8.51 |
| AA536808      | 1455495_at   | Expressed sequence AA536808                                                        | 1  | 158.5 | 8.51 |
| Ptpn21        | 1419054_a_at | protein tyrosine phosphatase, non-receptor type 21                                 | 12 | 99.1  | 8.51 |
| Slc25a36      | 1419657_a_at | solute carrier family 25, member 36                                                | 9  | 96.9  | 8.51 |
| BC030863      | 1434221_at   | cDNA sequence BC030863                                                             | 6  | 120.9 | 8.51 |
| Trim2         | 1417027_at   | tripartite motif protein 2                                                         | 3  | 84.2  | 8.51 |
| Apc           | 1435543_at   | adenomatosis polyposis coli                                                        | 18 | 34.4  | 8.51 |
| 1459202_at    | 1459202_at   | ---                                                                                | 6  | 120.7 | 8.51 |
| Csad          | 1427981_a_at | cysteine sulfinic acid decarboxylase thyroid hormone receptor associated protein 3 | 15 | 102   | 8.51 |
| Thrap3        | 1460545_at   | protein 3                                                                          | 7  | 63.4  | 9.15 |
| Jmjd2b        | 1440368_at   | Jumonji domain containing 2B                                                       | 17 | 56    | 9.15 |
| Marcks1       | 1435627_x_at | MARCKS-like 1                                                                      | 4  | 129   | 9.15 |
| Trim2         | 1459860_x_at | tripartite motif protein 2                                                         | 7  | ?     | 9.15 |
| 9630054F20Rik | 1455862_at   | RIKEN cDNA 9630054F20 gene                                                         | 11 | 32.4  | 9.15 |
| Sfrs7         | 1436871_at   | splicing factor, arginine/serine-rich 7                                            | 17 | 80.1  | 9.15 |
| 5430405G24Rik | 1424666_at   | RIKEN cDNA 5430405G24 gene                                                         | 11 | 102.3 | 9.15 |

|               |              |                                                                                                                                                                                                                                                                         |    |       |      |
|---------------|--------------|-------------------------------------------------------------------------------------------------------------------------------------------------------------------------------------------------------------------------------------------------------------------------|----|-------|------|
| Ddef2         | 1436181_at   | development and differentiation enhancing factor 2                                                                                                                                                                                                                      | 12 | 21.5  | 9.15 |
| Vdr           | 1418175_at   | vitamin D receptor                                                                                                                                                                                                                                                      | 15 | 97.7  | 9.15 |
| 9030420J04Rik | 1457682_at   | RIKEN cDNA 9030420J04 gene                                                                                                                                                                                                                                              | 9  | 9     | 9.15 |
| Usp11         | 1426539_at   | ubiquitin specific peptidase 11<br>mitogen activated protein kinase binding protein 1                                                                                                                                                                                   | X  | 19.9  | 9.15 |
| Mapkbp1       | 1423403_at   |                                                                                                                                                                                                                                                                         | 2  | 119.7 | 9.15 |
| 9030611O19Rik | 1418879_at   | RIKEN cDNA 9030611O19 gene                                                                                                                                                                                                                                              | 12 | 31.7  | 9.15 |
| Trim2         | 1417028_a_at | tripartite motif protein 2                                                                                                                                                                                                                                              | 3  | 84.2  | 9.15 |
| ErbB2ip       | 1439079_a_at | ErbB2 interacting protein<br>nuclear factor of kappa light chain gene enhancer in B-cells inhibitor, alpha                                                                                                                                                              | 13 | 104.9 | 9.15 |
| Nfkbia        | 1449731_s_at | 5-hydroxytryptamine (serotonin) receptor 1D                                                                                                                                                                                                                             | 12 | 56.4  | 9.15 |
| Htr1d         | 1440166_x_at |                                                                                                                                                                                                                                                                         | 4  | 135.7 | 9.15 |
| Arhgap17      | 1459667_at   | Rho GTPase activating protein 17<br>LON peptidase N-terminal domain and ring finger 1                                                                                                                                                                                   | 7  | 123.1 | 9.15 |
| Lonrf1        | 1455665_at   |                                                                                                                                                                                                                                                                         | 8  | 37.7  | 9.15 |
| Foxp1         | 1435222_at   | forkhead box P1                                                                                                                                                                                                                                                         | 6  | 98.9  | 9.15 |
| Nisch         | 1452156_a_at | nischarin                                                                                                                                                                                                                                                               | 14 | 30    | 9.15 |
| 2810455D13Rik | 1435947_at   | RIKEN cDNA 2810455D13 gene<br>DEAH (Asp-Glu-Ala-His) box polypeptide 36                                                                                                                                                                                                 | 19 | 23.8  | 9.15 |
| Dhx36         | 1424397_at   |                                                                                                                                                                                                                                                                         | 3  | 62.6  | 9.15 |
| C130068B02Rik | 1440317_at   | RIKEN cDNA C130068B02 gene<br>ATP-binding cassette, sub-family A (ABC1), member 5                                                                                                                                                                                       | 17 | 29.9  | 9.15 |
| Abca5         | 1459391_at   |                                                                                                                                                                                                                                                                         | 11 | 110.1 | 9.15 |
| 2010010M04Rik | 1436631_at   | RIKEN cDNA 2010010M04 gene                                                                                                                                                                                                                                              | 18 | 35.3  | 9.15 |
| 2310058N22Rik | 1429215_at   | RIKEN cDNA 2310058N22 gene<br>secretoglobin, family 1A, member 1 (uterglobin)                                                                                                                                                                                           | 12 | 116.8 | 9.15 |
| Scgb1a1       | 1452543_a_at |                                                                                                                                                                                                                                                                         | 19 | 9.2   | 9.15 |
| 1436248_at    | 1436248_at   | Adult male spinal cord cDNA, RIKEN full-length enriched library, clone:A330033L11<br>product:unclassifiable, full insert sequence<br>Adult male olfactory brain cDNA, RIKEN full-length enriched library, clone:6430530F17 product:unclassifiable, full insert sequence | 1  | 159   | 9.15 |
| 1442743_at    | 1442743_at   |                                                                                                                                                                                                                                                                         | 9  | 65.6  | 9.15 |
| 1435872_at    | 1435872_at   | Transcribed locus                                                                                                                                                                                                                                                       | 6  | 29.2  | 9.15 |
| Tbc1d17       | 1423659_a_at | TBC1 domain family, member 17                                                                                                                                                                                                                                           | 7  | 44.7  | 9.15 |
| 3732413I11Rik | 1452769_at   | RIKEN cDNA 3732413I11 gene                                                                                                                                                                                                                                              | 11 | 44.4  | 9.15 |
| Mbtd1         | 1448641_at   | mbt domain containing 1                                                                                                                                                                                                                                                 | 11 | 93.7  | 9.15 |
| Pcbp2         | 1435881_at   | poly(rC) binding protein 2<br>solute carrier organic anion transporter family, member 4a1                                                                                                                                                                               | 15 | 102.3 | 9.15 |
| Slco4a1       | 1455803_at   |                                                                                                                                                                                                                                                                         | 2  | 180.4 | 9.15 |
| A430102J17Rik | 1438895_at   | RIKEN cDNA A430102J17 gene                                                                                                                                                                                                                                              | 18 | 7.9   | 9.15 |
| 1439631_at    | 1439631_at   | ---                                                                                                                                                                                                                                                                     | 4  | 108   | 9.15 |
| Ly6e          | 1439773_at   | lymphocyte antigen 6 complex, locus E<br>Calcium/calmodulin-dependent serine protein kinase (MAGUK family)                                                                                                                                                              | 15 | 74.8  | 9.15 |
| Cask          | 1445152_at   |                                                                                                                                                                                                                                                                         | X  | 12.9  | 9.15 |
| Usp46         | 1436518_at   | Ubiquitin specific peptidase 46<br>solute carrier family 36 (proton/amino acid symporter), member 2                                                                                                                                                                     | 5  | 74.3  | 9.15 |
| Slc36a2       | 1436521_at   |                                                                                                                                                                                                                                                                         | 11 | 55    | 9.15 |
| Prr3          | 1424145_at   | proline-rich polypeptide 3                                                                                                                                                                                                                                              | 17 | 35.6  | 9.15 |
| Ihpk2         | 1435319_at   | inositol hexaphosphate kinase 2                                                                                                                                                                                                                                         | 9  | 108.7 | 9.15 |
| Ncor1         | 1423202_a_at | nuclear receptor co-repressor 1                                                                                                                                                                                                                                         | 11 | 62.1  | 9.15 |
| Top3b         | 1438387_x_at | topoisomerase (DNA) III beta                                                                                                                                                                                                                                            | 16 | 16.8  | 9.15 |
| Yaf2          | 1429839_a_at | YY1 associated factor 2                                                                                                                                                                                                                                                 | 15 | 93.1  | 9.15 |
| 2310032F03Rik | 1453568_at   | RIKEN cDNA 2310032F03 gene                                                                                                                                                                                                                                              | 2  | 59.3  | 9.15 |
| Prkci         | 1417410_s_at | protein kinase C, iota                                                                                                                                                                                                                                                  | 3  | 31.2  | 9.15 |

|               |              |                                                                                |    |       |      |
|---------------|--------------|--------------------------------------------------------------------------------|----|-------|------|
| Cblb          | 1458469_at   | Casitas B-lineage lymphoma b                                                   | 16 | 52    | 9.15 |
| 1700019H03Rik | 1432023_a_at | RIKEN cDNA 1700019H03 gene                                                     | 2  | 180.7 | 9.15 |
| Pex19         | 1442815_at   | Peroxisome biogenesis factor 19                                                | 9  | ?     | 9.15 |
| 1443862_at    | 1443862_at   | ---                                                                            | 11 | 93.7  | 9.15 |
| Hsf1          | 1424622_at   | heat shock factor 1<br>ADP-ribosylation factor-like 6 interacting<br>protein 5 | 15 | 76.3  | 9.15 |
| Arl6ip5       | 1440360_at   |                                                                                | 6  | 97.2  | 9.15 |
| Otx1          | 1437601_at   | orthodenticle homolog 1 (Drosophila)                                           | 11 | 21.9  | 9.15 |
| Pak3          | 1417923_at   | p21 (CDKN1A)-activated kinase 3                                                | X  | 138.9 | 9.15 |

## Supplementary Table 9

### Genes in the Papilloma Susceptibility Network (Figure 4 in manuscript)

| Symbol   | Title                                                                                                               | Chr. | Mb  | Strongest QTL   | Raw P value | Corrected p-value |
|----------|---------------------------------------------------------------------------------------------------------------------|------|-----|-----------------|-------------|-------------------|
| Alox8    | arachidonate 8-lipoxygenase                                                                                         | 11   | 69  | Chr. 15, 101 Mb | 0.0004      | 0.03              |
| Aox4     | aldehyde oxidase 4                                                                                                  | 1    | 58  | Chr. 15, 101 Mb | 0.003       | 0.08              |
| Defb3    | defensin beta 3<br>eosinophil-associated,                                                                           | 8    | 19  | Chr. 15, 101 Mb | 0.003       | 0.4               |
| Ear5     | ribonuclease A family, member 5<br>GRP1 (general receptor for<br>phosphoinositides 1)-associated                    | 14   | 50  | Chr. 15, 101 Mb | 0.002       | 0.11              |
| Grasp    | scaffold protein<br>interleukin 1 family, member 5                                                                  | 15   | 101 | Chr. 15, 101 Mb | 3.36E-09    | < 0.01            |
| Il1f5    | (delta)                                                                                                             | 2    | 24  | Chr. 15, 101 Mb | 0.001       | 0.08              |
| Il1f6    | interleukin 1 family, member 6                                                                                      | 2    | 24  | Chr. 15, 101 Mb | 0.0004      | 0.01              |
| Il1f8    | interleukin 1 family, member 8                                                                                      | 2    | 24  | Chr. 1, 8 Mb    | 0.005       | 0.32              |
| Il1f9    | interleukin 1 family, member 9                                                                                      | 2    | 24  | Chr. 8, 20 Mb   | 0.002       | 0.19              |
| Kifc1    | Kinesin family member C1                                                                                            | 17   | 34  | Chr 17, 22 Mb   | 4.73E-09    | < 0.01            |
| Krt6b    | keratin 6B                                                                                                          | 15   | 102 | NA              | NA          | NA                |
| Krt78    | keratin 78                                                                                                          | 15   | 102 | Chr. 15, 101 Mb | 1.05E-05    | < 0.01            |
| Ly6e     | lymphocyte antigen 6 complex,<br>locus E<br>NTPase, KAP family P-loop<br>domain containing 1                        | 15   | 75  | Chr. 15, 73 Mb  | 1.28E-07    | < 0.01            |
| Nkpd1    |                                                                                                                     | 7    | 19  | Chr. 15, 101 Mb | 0.0002      | 0.01              |
| Pcbp2    | poly(rC) binding protein 2<br>phosphodiesterase 4B, cAMP<br>specific                                                | 15   | 102 | Chr. 15, 101 Mb | 1.97E-10    | < 0.01            |
| Pde4b    |                                                                                                                     | 4    | 102 | Chr. 15, 101 Mb | 2.00E-03    | 0.2               |
| Pdzk1ip1 | PDZK1 interacting protein 1                                                                                         | 4    | 115 | Chr. 15, 101 Mb | 0.0017      | 0.17              |
| Pla2g2f  | phospholipase A2, group IIF                                                                                         | 4    | 138 | Chr. 15, 84 Mb  | 0.0008      | 0.1               |
| Pp11r    | placental protein 11 related<br>rabaptin, RAB GTPase binding<br>effector protein 2                                  | 15   | 98  | E15.101.379_10  | 0.002       | 0.16              |
| Rabep2   |                                                                                                                     | 7    | 126 | Chr. 15, 101 Mb | 0.001       | 0.13              |
| Rptn     | repetin<br>S100 calcium binding protein A8<br>(calgranulin A)                                                       | 3    | 94  | NA              | NA          | NA                |
| S100a8   |                                                                                                                     | 3    | 91  | Chr. 6, 147 Mb  | 0.001       | 0.18              |
| Scd2     | stearoyl-Coenzyme A desaturase<br>2<br>solute carrier family 37 (glycerol-<br>3-phosphate transporter),<br>member 2 | 19   | 44  | Chr. 15, 101 Mb | 0.0006      | 0.04              |
| Slc37a2  | solute carrier family 5<br>(sodium/glucose cotransporter),<br>member 9                                              | 9    | 37  | Chr. 15, 101 Mb | 4.76E-05    | < 0.01            |
| Slc5a9   |                                                                                                                     | 4    | 111 | Chr. 15, 101 Mb | 0.0004      | 0.07              |
| Sprr2d   | small proline-rich protein 2D                                                                                       | 3    | 92  | Chr 18, 69 Mb   | 0.004       | 0.37              |
| Sprr2i   | small proline-rich protein 2I                                                                                       | 3    | 93  | NA              | NA          | NA                |
| Tbc1d17  | TBC1 domain family, member 17                                                                                       | 7    | 45  | Chr 17, 22 Mb   | 3.98E-05    | < 0.01            |
| Thop1    | thimet oligopeptidase 1                                                                                             | 10   | 81  | Chr. 15, 101 Mb | 0.001       | 0.12              |
| Tmprss1  | transmembrane protease, serine                                                                                      | 5    | 88  | NA              | NA          | NA                |

|       |                    |    |    |                 |          |      |
|-------|--------------------|----|----|-----------------|----------|------|
| 1a    | 11a                |    |    |                 |          |      |
| Tuba4 | tubulin, alpha 4   | 1  | 75 | Chr. 15, 101 Mb | 0.0004   | 0.05 |
| Vdr   | vitamin D receptor | 15 | 98 | Chr. 15, 101 Mb | 1.66E-06 | 0.01 |

## SUPPLEMENTARY REFERENCES

- 31 Assenov, Y., Ramirez, F., Schelhorn, S.E., Lengauer, T., and Albrecht, M.,  
Computing topological parameters of biological networks. *Bioinformatics* **24**, 282  
(2008).
- 32 Zinser, G.M., Sundberg, J.P., and Welsh, J., Vitamin D(3) receptor ablation sensitizes  
skin to chemically induced tumorigenesis. *Carcinogenesis* **23**, 2103 (2002).
- 33 Ellison, T.I., Smith, M.K., Gilliam, A.C., and Macdonald, P.N., Inactivation of the  
Vitamin D Receptor Enhances Susceptibility of Murine Skin to UV-Induced  
Tumorigenesis. *J. Invest. Dermatol.* 2008).
- 34 Saramaki, A., Banwell, C.M., Campbell, M.J., and Carlberg, C., Regulation of the  
human p21(waf1/cip1) gene promoter via multiple binding sites for p53 and the  
vitamin D3 receptor. *Nucleic Acids Res* **34**, 543 (2006).
- 35 Han, G., Li, A.G., Liang, Y.Y., Owens, P., He, W. et al., Smad7-induced beta-catenin  
degradation alters epidermal appendage development. *Developmental cell* **11**, 301  
(2006).
- 36 Yanagisawa, J., Yanagi, Y., Masuhiro, Y., Suzawa, M., Watanabe, M. et al.,  
Convergence of transforming growth factor-beta and vitamin D signaling pathways  
on SMAD transcriptional coactivators. *Science* **283**, 1317 (1999).
- 37 Yanagi, Y., Suzawa, M., Kawabata, M., Miyazono, K., Yanagisawa, J. et al., Positive  
and negative modulation of vitamin D receptor function by transforming growth  
factor-beta signaling through smad proteins. *J. Biol. Chem.* **274**, 12971 (1999).
- 38 Essers, M.A., de Vries-Smits, L.M., Barker, N., Polderman, P.E., Burgering, B.M. et  
al., Functional interaction between beta-catenin and FOXO in oxidative stress  
signaling. *Science* **308**, 1181 (2005).
- 39 Hoogeboom, D., Essers, M.A., Polderman, P.E., Voets, E., Smits, L.M. et al.,  
Interaction of FOXO with beta-catenin inhibits beta-catenin/T cell factor activity. *J.*  
*Biol. Chem.* **283**, 9224 (2008).
- 40 Cianferotti, L., Cox, M., Skorija, K., and Demay, M.B., Vitamin D receptor is  
essential for normal keratinocyte stem cell function. *Proc. Natl. Acad. Sci. U. S. A.*  
**104**, 9428 (2007).
